# Supplementary material for: Investigation of short-term effective radiative forcing of fire aerosols over North America using nudged hindcast ensembles
Source: Copernicus journal article supplement (doi:10.5194/acp-2017-414), 2017-06-07
Supplement: Supplementary file [file marked_up manuscript-new.pdf › Reply2/marked_up manuscript-new.pdf]

# **Investigating the short-term effective radiative forcing of fire aerosols using nudged hindcast ensembles**

Yawen Liu<sup>1, 2</sup>, Kai Zhang<sup>2</sup>, Yun Qian<sup>2</sup>, Yuhang Wang<sup>3</sup>, Yufei Zou<sup>3</sup>, Yongjia Song<sup>3</sup>, Hui Wan<sup>2</sup>, Xiaohong Liu<sup>4</sup>, and Xiu-Qun Yang<sup>1</sup>

<sup>1</sup>School of Atmospheric Sciences, Nanjing University, Nanjing, China

<sup>2</sup>Pacific Northwest National Laboratory, Richland, Washington, USA

<sup>3</sup>School of Earth and Atmospheric Sciences, Georgia Institute of Technology, Atlanta, Georgia, USA

<sup>4</sup>Department of Atmospheric Science, University of Wyoming, Laramie, Wyoming, USA

Corresponding to: Yun Qian [Yun.Qian@pnnl.gov]

## Abstract

Aerosols from fire emissions can potentially have large impact on clouds and radiation. However, fire aerosol sources are often intermittent and their effect on weather and climate is difficult to quantify. Here we investigated the short-term effective radiative forcing of fire aerosols using the global aerosol-climate model Community Atmosphere Model Version 5 (CAM5). Different from previous studies, we used nudged hindcast ensembles to quantify the forcing uncertainty due to the chaotic response to small perturbations in the atmosphere state. Daily mean emissions from three fire inventories were used to consider the uncertainty in emission strength and injection heights. The simulated aerosol optical depth (AOD) and mass concentrations were evaluated against in-situ measurements and re-analysis data. Overall, the results show the model has reasonably good predicting skills. Short (10-day) nudged ensemble simulations were then performed with and without fire emissions to estimate the effective radiative forcing. Results show fire aerosols have large effects on both liquid and ice clouds over the two selected regions in April 2009. Ensemble mean results show strong negative shortwave cloud radiative effect (SCRE) over almost the entire Southern Mexico, with a 10-day regional mean value of  $-3.02 \text{ W m}^{-2}$ . Over the Central U.S, the SCRE is positive in the north but negative in the south and the regional mean SCRE is small ( $-0.56 \text{ W m}^{-2}$ ). For the 10-day average, we found a large ensemble spread of regional mean shortwave cloud radiative effect over Southern Mexico (15.6% of the corresponding ensemble mean) and the Central U.S. (64.3%), despite that the regional mean AOD time series are almost indistinguishable during the 10-day period. Moreover, the ensemble spread is much larger when using daily averages instead of 10-day averages. ~~For the case investigated here, a minimum of 9 ensemble members is necessary to get a reasonable estimate of the ensemble mean and spread of the forcing on individual days.~~ This demonstrates the importance of using a large ensemble of simulations to estimate the short-term aerosol effective radiative forcing.

## 1. Introduction

Natural and human-induced fires play an important role in the Earth system. Aerosol and gas emissions from biomass burning can change the atmospheric composition and potentially affect the weather and climate. Over 30% of the global total emission of black carbon (BC) comes from open burning of forests, grasslands and agricultural residues (Bond et al. 2013). For organic aerosols, substantial increases of concentrations dominated by organic carbon enhancements are observed in regions with biomass burning events (Zeng et al. 2011; Lin et al. 2013; Brito et al. 2014; Reddington et al. 2014). As a result, biomass burning emissions have a large impact on the global and regional mean aerosol optical depth (Jacobson, 2014).

Through interactions with radiation and cloud, fire aerosols can significantly affect the long-term Earth's energy budget. Previous studies have investigated the global and regional radiative forcing of fire aerosols using long climatological simulations or satellite retrievals. For example, Ward et al. (2012) investigated the radiative forcing of global fires in pre-industrial, present day, and future periods. For the present-day condition, they estimated a direct aerosol effect (or radiative forcing through aerosol–radiation interactions as defined in IPCC AR5, RF<sub>ari</sub>; see section 2.4) of  $+0.1 \text{ W m}^{-2}$  and an indirect effect (radiative forcing through aerosol–cloud interactions, RF<sub>aci</sub>) of  $-1.0 \text{ W m}^{-2}$ . Using a newer model, Jiang et al. (2016) found similar RF<sub>ari</sub> but slightly smaller RF<sub>aci</sub> ( $-0.70 \text{ W m}^{-2}$ ). Sena et al.

(2013) assessed the direct impact of biomass burning aerosols over the Amazon basin using satellite data. Over the 10-year ~~studied-study~~ period, the estimated radiative forcing is about  $-5.6 \text{ W m}^{-2}$ .

On short timescales, fire aerosols have even larger radiative impacts. Observed maximum daily direct aerosol radiative effects can reach  $-20 \text{ W m}^{-2}$  at TOA locally in Amazonia during biomass burning seasons (Sena et al., 2013). Very large direct effects of fire aerosols were observed during extreme fire events over Central Russia (Tarasova et al. 2004; Chubarova et al. 2008; Chubarova et al. 2012). Instantaneous [direct](#) radiative effects of emitted aerosols reached  $-167 \text{ W m}^{-2}$  and monthly mean [direct](#) radiative effects reached about  $-65 \text{ W m}^{-2}$  in the 2010 Russia wildfires (Chubarova et al. 2012). ~~Kolusu et al. (2015) investigated direct radiative effect of biomass burning aerosols over tropical Southern America. By quantifying results from the first and second day of 2-day single-member forecasts in September 2012, they found the modeled biomass burning aerosols reduced all-sky net radiation by  $8 \text{ W m}^{-2}$  at TOA and  $15 \text{ W m}^{-2}$  at surface.~~ [Fire aerosol indirect effect may also significantly affect the cloud formation and radiative balance on short time scales.](#) Using satellite data and a radiative transfer model, Kaufman et al. (2005) found an [indirect](#) radiative effect of  $-9.5 \text{ W m}^{-2}$  due to smoke aerosol-induced cloud changes over Southeast Atlantic for the 3 months studied. Smoke-derived cloud albedo effect on local shortwave radiative forcing is estimated to be between  $-2$  and  $-4 \text{ W m}^{-2}$  in a day case study of aircraft-measured indirect cloud effects (Zamora et al., 2016). ~~Kolusu et al. (2015) investigated direct radiative effect of biomass burning aerosols over tropical Southern America. By quantifying results from the first and second day of 2 day single member forecasts in September 2012, they found the modeled biomass burning aerosols reduced all sky net radiation by  $8 \text{ W m}^{-2}$  at TOA and  $15 \text{ W m}^{-2}$  at surface.~~

Previous modeling studies on the short-term fire aerosol effects mainly focused on aerosol direct effects (e.g., Keil and Haywood, 2003; Chen et al., 2014; Kolusu et al., 2015), and only a couple of studies investigated the indirect effects of fire aerosols (Lu et al. 2013). In addition, to estimate the aerosol indirect effect, long simulations (multi-years,  $>5$  years preferred) are often needed to remove the noise, because aerosol life cycle and cloud properties are affected by strong natural variability on different timescales (Bony et al. 2006; Kooperman et al. 2012). To solve the problem, alternative methods have been proposed to help extract signals with shorter simulations. For example, nudging (also called Newton relaxation method) can help reduce uncertainties associated with natural variability by constraining certain meteorological fields towards prescribed conditions. A robust estimate of global anthropogenic aerosol indirect effects can be obtained on substantially shorter timescales (1-2 years) by implementing nudging to constrain simulations with pre-industrial and present-day aerosol emissions toward identical circulation and meteorology (Kooperman et al. 2012). When nudged towards re-analysis data, Zhang et al. (2014) found constraining only the horizontal winds is a preferred strategy to estimate the aerosol indirect effect since it provides well-constrained meteorology without strongly perturbing the model's mean climate state. Another example is the use of representative ensembles of short simulations to replace a typical long integration. Wan et al. (2014) explored the feasibility of this method and showed that 3-day ensembles of 20 to 50 members are able to reveal the main signals revealed by traditional 5-year simulations.

In this study, we performed month-long and 10-day nudged CAM5 simulations to investigate the effects of fire aerosols on radiation and cloud processes on short time scales (less than two weeks). Horizontal winds were nudged towards [6-hourly](#) reanalysis to constrain the large-scale circulation and to allow for more accurate model evaluations

against observations. We also used daily mean emissions from three fire inventories to consider the uncertainty in emission strength and injection heights. Even for short simulations, small perturbations of meteorological states might have large impact on the local aerosol and cloud properties, thus bring uncertainty to the aerosol forcing estimate. Therefore, in our simulations, we also employed very weak temperature nudging ([~10days](#)) in combination with ensembles to quantify the uncertainty. [More details of the nudging setup are described in section2.3.](#)

The rest of the paper is organized as follows. Sect. 2 describes the model and data used in this study. It also introduces how the ensembles are generated in the short nudged simulations and explains how the fire aerosol forcing is estimated. Results and discussions are presented in Sect. 3 and conclusions are summarized in Sect. 4

## **2. Model, Method and Data**

### **2.1 Model description**

In this study, we used the Community Atmosphere Model (CAM) version 5.3 with the finite volume dynamical core at  $1.9^\circ$  (latitude)  $\times$   $2.5^\circ$  (longitude) horizontal resolution with 30 vertical layers. The aerosol life cycle is represented using the modal aerosol module MAM3 (Liu et al., 2012). CAM5 links the simulated aerosol fields with cloud and radiation through interactions of the aerosol module with the cloud microphysics and radiative transfer parameterizations. The two-moment bulk cloud microphysics scheme from Morrison and Gettelman (2008) is used to track mass mixing ratios and number concentrations of cloud droplets and ice crystals in stratiform clouds. Representation of shallow convection is based on the work of Park and Bretherton (2009). The deep convection parameterization was developed by Zhang and McFarlane (1995) and later revised by Richter and Rasch (2008) and Neale et al. (2008). Longwave and shortwave radiative transfer are calculated with the Rapid Radiative Transfer Model for GCMs (RRTMG, Malwer et al. 1997; Iacono et al. 2008).

### **2.2 Fire Emission Inventories**

Three fire emission inventories were used in this study. Two of them are widely used bottom-up inventories— Global Fire Emissions Database version 3.1 (GFED v3.1, van der Werf et al., 2010; [https://daac.ornl.gov/cgi-bin/dsviewer.pl?ds\\_id=1191](https://daac.ornl.gov/cgi-bin/dsviewer.pl?ds_id=1191)) and GFED v4.1s (Giglio et al. 2013; Randerson et al. 2012; [https://daac.ornl.gov/VEGETATION/guides/fire\\_emissions\\_v4.html](https://daac.ornl.gov/VEGETATION/guides/fire_emissions_v4.html)). Another one is a top-down emission inventory—Quick Fire Emissions Dataset version 2.4 (QFED v2.4). GFED v3.1 and GFED v4.1s provide global monthly emissions at  $0.25^\circ \times 0.25^\circ$  degree spatial resolution from 1997 through the present. Daily emission data [arecan be](#) obtained by disaggregating monthly emissions based on daily temporal variability in fire emissions derived from MODIS measurements of active fires (Mu et al. 2011). [The daily emission data is obtained using daily scalars \(http://www.globalfiredata.org/data.html\) to distribute monthly emissions over the days and is only available from 2003 onwards.](#) The more recent version GFED v4.1s improves by including small fires based on active fire detections outside the burned area maps (Randerson et al., 2012). QFED v2.4 estimates global fire emissions using the Moderate Resolution Imaging Spectroradiometer (MODIS) measurements of fire radiative power and generates daily products at  $0.1^\circ \times 0.1^\circ$  degree resolution.



To drive CAM5 simulations, fire emission data were regridded to the model resolution and distributed vertically. For the GFED v3.1 and QFED v2.4 emission data we adopted the same injection heights (from surface to 6 km) as used in the standard CAM5 model. While for GFEDv4.1s, in this study the injection heights were estimated using a fire plume model and scaled to the 6-hourly interval.

The fire emission inventories were first analyzed to select appropriate time periods and regions for our study before being used to drive model simulations. Fig.1 shows the multi-year mean biomass burning emissions from GFED v4.1 over North America. The emission manifests significant seasonality with large dry matter consumption during March to April and June to September. The summer and autumn burning covers Pacific Northwest and part of Canada and is mainly associated with forest fires, while the spring burning occurs in more densely populated regions like Mexico and central and eastern United States with a large contribution of agricultural fires in croplands (Korontzi et al., 2006; Magi et al., 2012). Similar features are also captured in GFED v3.1 and QFED v2.4 with differences in the magnitude. We chose to analyze the simulated fire aerosol effect in April, the peak month of spring burning, when there are extreme fire activities over Mexico (10 N to 25N, 100W to 80W) and occasionally large fires in the Central U.S. (35 N to 45N, 100W to 85W). For the U.S., extended fire period is rare, making it necessary to perform short-term evaluation. Fire aerosols formed from these two regions are often transported to the Eastern and Southeastern U.S., where they mix with aerosols from anthropogenic sources and potentially have significant impact on clouds and radiation over these areas. Time series of regional mean fire emissions in April during 2003-2014 shows that relatively large fires occur in both regions in 2009 (Fig.S1). Values of fire emissions in 2009 are larger than the multi-year April mean by a factor of 1.9 in the Central U.S. and 1.5 in Southern Mexico. Thus, in the following model simulations, we focused on analyzing the aerosol properties and radiative effects over the two selected regions (denoted by the red boxes in Fig.1) in April, 2009.

Fire emitted BC from different emission inventories in April, 2009 is shown in Fig.2. Although GFED v4.1s includes the contributions of small fires (Randerson et al., 2012), the emitted BC in GFED v4.1 shows no substantial increase compared to GFED v3.1 during the selected period. Only an increase by 1.75 is seen over Southern Mexico. In the Central U.S., the BC emission is even slightly weaker in GFED v4.1. QFED v2.4 shows a much larger BC emission than the GFED inventories. ~~Monthly mean Values~~-values of emitted BC in QFED v2.4 are larger than those in GFED v4.1s by a factor of ~~9.7-11.4~~ in the Central U.S. and a factor of ~~2.7-3.3~~ in Southern Mexico.

## 2.3 Simulations

Two groups of simulations were conducted (Table1) using the same greenhouse gas concentrations, sea surface conditions and anthropogenic emissions of aerosols and precursors. Each group includes four simulations, performed either without fire emission or with daily fire emissions from one of the three fire emission inventories introduced in section 2.2. The emitted species include BC, OC, and SO<sub>2</sub>. Horizontal winds were nudged to 6-hourly ERA-Interim reanalysis (Dee et al., 2011) as described in Zhang et al. (2014) in both groups.

Simulations in Group A are month-long single-member nudged simulations. These simulations were performed to provide longer time series for model evaluation and generate initial condition files for simulations in Group B. They

started from January 1, 2009 and were integrated for four months with 3-month spin-up. Initial condition files were generated on April 1 at 00 UTC for simulations in group B.

Simulations in group B are 10-day ensemble simulations. Unlike the traditional way of perturbing initial conditions, in this study we constructed the ensembles by implementing a very weak temperature nudging and perturbing the nudging time scale. This is because under the influence of horizontal-wind nudging, ensemble differences generated by perturbing initial conditions would fade away during the integration. In contrast, our method can consider the influence of small temperature perturbations during the entire simulation period, as nudging is applied at every time step. On the other hand, the large-scale circulation patterns simulated in the different ensemble members are very similar (not shown), so the noises caused by the chaotic system can be constrained and the effective fire aerosol forcing signal can be easily identified.

Each ensemble in group B includes 10 members. The only difference between the members is the relaxation time scale of temperature, which varies from 10 to 11 days at an interval of 0.1 day. All simulations started on April 1, 2009 and were integrated for 10 days. For each simulation (e.g. E\_QF), the initial condition was generated by combining the meteorological fields from initial condition outputs in the S\_NF simulation with aerosol and precursor concentrations from initial condition outputs in the single-member simulation forced by the corresponding fire emission (S\_QF).

## 2.4 Calculation of fire aerosol RF

The IPCC AR5 report provides a more useful characterization of aerosol forcing by allowing for rapid tropospheric adjustments (Boucher et al., 2013) compared to the original definition of aerosol forcing. It quantifies aerosol radiative effects in terms of Effective Radiative Forcing from aerosol-radiation interactions (ERF<sub>ari</sub>) and Effective Radiative Forcing from aerosol-cloud interactions (ERF<sub>aci</sub>). ERF<sub>ari</sub> refers to the combined effect of instantaneous radiative forcing from direct scattering and absorption of sunlight (aerosol direct effect) and related subsequent rapid adjustments of atmospheric state variables and cloudiness (aerosol semi-direct effect). ERF<sub>aci</sub> refers to the indirect forcing resulting from aerosol induced changes in cloud albedo (first albedo effect) and subsequent changes in cloud lifetime as rapid adjustments (second aerosol indirect effect) via microphysical interactions.

To allow for a straightforward comparison with previous studies in the literature, we followed the IPCC concept of including rapid adjustments (effective aerosol radiative forcing), but continued to decompose the aerosol effect in the conventional terms as aerosol direct radiative effect (DRE), aerosol cloud radiative effect (CRE) and surface albedo effect. Note that as nudging timescale determines the degree to which model physics are constrained (Kooperman et al., 2012), the use of a 6-hour relaxation time scale for horizontal wind nudging means only very fast adjustments are considered in the simulations.

Similar to Jiang et al. (2016), our calculations ~~of fire aerosol DRE, CRE and surface albedo effect~~ are based on the work of Ghan et al. (2012) and Ghan (2013). Fire aerosol DRE, CRE and surface albedo effect are defined as fire induced changes in aerosol forcing, cloud forcing, and surface albedo forcing respectively, and are calculated as the difference of each item ~~They were calculated as the radiative flux differences~~ between simulations with and without fire emissions (denoted by  $\Delta$ ). In each simulation, aerosol ~~(direct)~~ forcing was defined as the difference between all-

sky and clean-sky TOA radiative fluxes ( $F - F_{\text{clean}}$ ). ~~Aerosol-induced eCloud forcing change~~ was defined as the difference between all-sky and clear sky TOA radiative fluxes under clean-sky conditions ( $F_{\text{clean}} - F_{\text{clean,clear}}$ ). The rest were related to surface albedo forcing ( $F_{\text{clean,clear}}$ ). Thus fire aerosol DRE, CRE, and surface albedo effect were expressed as  $\Delta(F - F_{\text{clean}})$ ,  $\Delta(F_{\text{clean}} - F_{\text{clean,clear}})$ , and  $\Delta F_{\text{clean,clear}}$ , respectively. More details about the method can be found in section 2 of Ghan (2013). CRE includes contributions of both aerosol indirect effect and aerosol semi-direct effect but was analyzed as a single term (i.e., the sum).

## 2.5 Observational Data

In this study, we used two sets of AOD reanalysis and the AERONET data (Holben et al. 1998) to evaluate the modeled AOD. The two AOD reanalysis datasets are the Naval Research Laboratory (NRL) reanalysis (Rubin et al. 2015) and the Monitoring Atmospheric Composition and Climate (MACC) reanalysis (Eskes et al. 2015). Both are generated by assimilating AOD retrievals from MODIS (Zhang et al., 2008; Benedetti et al., 2009) with forecast fields. The NRL reanalysis provides 6-hourly AOD at 1° horizontal resolution. The MACC dataset provides 3-hourly AOD at 1.125° horizontal resolution. Daily averages in April, 2009 were used for model evaluation in this study. AERONET retrievals of AOD from April 1 to April 30 in 2009 were used for model evaluation. Two sites are available in the selected regions: Cart\_Site (36°N, 97°W) and Mexico\_City (19°N, 99°W). LEV 2.0 cloud-screened all points AOD at 500 nm and 675 nm was used to generate hourly AOD at 550nm, which are the processed data based on a cloud-screening algorithm (Smirnov et al. 2000).

In addition, the simulated BC and primary organic matter (POM) concentrations were compared with observations from the Interagency Monitoring of Protected Visual Environments (IMPROVE) (Malm et al. 2004). IMPROVE aerosol data are only available over the Central U.S. A total of fifteen sites were selected and marked in Fig 2, which include the sites west of 94°W near the source region (asterisks) and sites east of 94°W in the downwind region (dots). Observed organic carbon concentrations were multiplied by 1.4 for comparison with simulated POM. Detailed descriptions about the data and sites are available at <http://vista.cira.colostate.edu/improve/>. The IMPROVE network collect 24-hour aerosol data on every third day. Daily averages during April, 2009 are compared on IMPROVE observation days only.

## 3. Results

In this part, the model performance is first evaluated based on the simulations in group A. Next, we present the simulated short-term effective fire aerosol forcing on 10-day and daily timescales based on the results from group B simulations. We will demonstrate the importance of using ensemble simulations in estimating the short-term aerosol effective forcing and give a quantitative estimate of how many ensemble members are needed for the case selected in this study.

### 3.1 Model Evaluation

Model simulated AOD are evaluated against the NRL and MACC reanalysis data (Fig. 3). The simulated temporal variation of regional mean AOD over the central U.S. is consistent with that in the reanalysis, but the magnitudes of simulated AOD are lower (Fig. 3). A better agreement is found between the model and the NRL data, despite the horizontal winds in the simulation are nudged towards a reanalysis that is very similar to the data used to derive MACC. Temporal correlation coefficients (TCC) between the modeled AOD and the NRL reanalysis are 0.87 and 0.82 for S\_QF and S\_GF4 simulations, respectively, but are lower (0.67 and 0.78) between the modeled AOD and the MACC reanalysis data. The corresponding root mean square errors rise from 0.13 (S\_QF) and 0.1 (S\_GF4) to 0.23 and 0.21. Generally, AOD is underestimated by a factor of 2-4 in all simulations compared to the reanalysis, especially in simulations with GFED emissions. Previous studies have [found the underestimation of AOD in simulations with GFED emissions and](#) suggested the need to scale up GFED emissions by a factor of 1-3 to match the observed AOD (Tosca et al., 2013). This is consistent with the large negative bias in the simulation S\_GF3 and S\_GF4. [However, a much larger scale factor might be needed in this case.](#) Simulated AOD in these two simulations are almost indistinguishable due to the small difference in the total fire emission in the region.

Over Mexico, different simulations produce similar temporal variations in AOD, but the magnitude is smaller in the GFED simulations. [Fire aerosol-induced AOD increase accounts for 8.1% \(S\\_GF3\), 11.2% \(S\\_GF4\) and 48.8% \(S\\_QF\) of the background AOD \(Table S2\).](#) Large discrepancies are found between model results and reanalysis data during Apr. 17-20. An increase of AOD is captured by both reanalysis datasets, while model results display a decrease of AOD compared to earlier days in the simulation period. Note that the two sets of reanalysis data also have some differences occasionally. For example, during Apr. 10-12, NRL data displays an increase of AOD, while MACC data show the opposite. These discrepancies may partly result from the large internal variability in this tropical region, where the simulated atmosphere state and its influence on aerosol transport are more likely to disagree between the model and the reanalysis. Generally speaking, the model forced with different fire emissions is capable of capturing daily variation of AOD in both regions, especially during Apr. 1-10. This period was selected for further investigation of the short-term fire aerosol effect.

Model simulated AOD are also evaluated against AERONET retrievals (Fig. 4). At Cart Site (36°N, 97°W), with the QFED emission (S\_QF) the model performs well in simulating both the temporal variation (TCC=0.62) and magnitude of AOD. Simulations with GFED emissions also reproduce the temporal evolution well (TCC = 0.58 for S\_GF3 and 0.55 for S\_GF4), but with significantly low bias (mean bias by a factor of 2). The simulated difference in AOD magnitude is similar to that found by Zhang et al. (2014) over the northern sub-Saharan African. Using the QFEDv2.4 fire emission, the simulated regional mean AOD is a factor of 1.5 higher than that using the GFEDv3.1 emission in their study. Relatively good performance of S\_QF is also seen over Mexico. The simulated time evolution agrees well with AERONET retrievals except for small discrepancies (e.g. during Apr.17 -19). A better agreement with the AERONET retrievals is found for the NRL data than MACC reanalysis at both sites. Consistent with the evaluation using reanalysis, the simulated temporal evolution of AOD during Apr. 1-10 agrees well with both reanalysis data and AERONET retrievals in selected regions. This gives us further confidence in choosing this period for further investigation.

The model is further evaluated against the IMPROVE data for BC and POM mass concentrations (Fig. 5). In the downwind region, the simulated mass concentrations in simulation S\_QF lie within a factor of 2 of the observed values at most sites. However, the magnitude is generally underestimated in simulations with the GFED emissions (S\_GF3 and S\_GF4), especially in S\_GF3. BC and POM concentrations in the downwind regions are affected by transport of aerosols from Southern Mexico (Fig. S3). A larger amount of fire emission in Southern Mexico would result in a higher BC (POM) concentration in the downwind region. This explains the slightly higher concentrations in the simulation S\_GF4 than S\_GF3, as BC and POM emissions over Southern Mexico are higher in GFED v4.1 due to the inclusion of small fires (Randerson et al., 2012). The good agreement between S\_QF and observations suggests that the QFED data have a reasonable total emission rate. However, in the source region, the simulation S\_QF displays large positive bias with a large majority of the values fall out of the a-factor-of-2 band. Given the reasonable total emission rate in QFED and a good agreement of AOD with AERONET retrievals at Cart\_site, this might result from the discrepancies in the vertical distribution the fire emissions. Fire-emitted BC and POM in simulations S\_QF and S\_GF3 reach maximum values in the lowest level and decrease sharply to the next level, while low-level fire emissions in S\_GF4 distribute in a more uniform way (Fig. S4). As the sampling was done on the lowest model level at most sites to compare with the IMPROVE data, this explains the strong overestimation in S\_QF. Although the same impact from vertical distribution of fire emission also appears in simulation S\_GF3, it is partly offset by its negative bias in the total emission rate.

### 3.2 10-day Mean Results

Given the good model performance during Apr 1-10, we proceed to analyze the short-term effects of fire aerosols during this period with nudged ensemble simulations. We define “fire AOD” as the AOD difference between the simulations with and without fire emissions.

#### 3.2.1 Fire Aerosol Distribution

Fig. 6 shows the spatial distributions of 10-day average ensemble mean fire AOD. For reference, the total AOD in the simulation without fire emissions is shown in Fig. S2. During the period, regional mean AOD increases by 6.4% (E\_GF3), 6.4% (E\_GF4) and 70.2% (E\_QF) in the central U.S. and 10.4% (E\_GF3), 13.3% (E\_GF4), and 49.6% (E\_QF) in Southern Mexico when fire emissions are included. In E\_QF, high fire AOD covers almost the entire selected region and extends further north. Maximum values of fire AOD stay above 0.2 around the Yucatan Peninsula. Over the Central U.S, significant fire AOD ranging between 0.04 and 0.1 appears in the southwest part of the selected region. Apart from the significant AOD difference in selected regions, large fire AOD also appears near the eastern coast as a result of local fire emission and the eastward transport of fire aerosols from both regions. Overall, the modeled fire AOD is much smaller in simulations with GFED emissions.

#### 3.2.2 Fire Aerosol Radiative Effect

As described in Sect. 2.4, fire aerosol radiative effect can be decomposed into three items including fire aerosol DRE, fire aerosol CRE and fire aerosol surface albedo effect (Table S3). Fig.7 shows the spatial distributions of

shortwave direct effect (SDRE) and shortwave cloud radiative effect (SCRE). They are major contributors to the total fire aerosol forcing in the selected regions. For reference, total aerosol forcing and total shortwave cloud forcing in the simulation without fire emissions are shown in Fig. S2. The spatial distribution of SDRE and SCRE are similar for the three cases, but with different magnitudes and statistical significant regions for simulations with QFED and GFED fire emissions. In the Central U.S., fire aerosol SDRE is negligible in GFED forced simulations due to small fire AOD. Although the fire AOD is larger in simulation E\_QF, the compensation between warming effect of fire BC and cooling effect of fire POM still results a weak forcing of about  $-0.1 \text{ W m}^{-2}$ . Over southern Mexico, all simulations produce significant cooling by fire aerosol SCRE with maximum values three times as large as those of corresponding SDRE. For both SDRE and SCRE, the largest fire aerosol effects appear in the E\_QF simulation while the E\_GF3 yields the weakest forcing, which is consistent with the modeled fire AOD in these simulations.

In the following analysis, we will focus on the results from the E\_QF simulation. Both SDRE and SCRE spread outside the two selected regions and extend eastward reaching coast regions. A stronger fire aerosol effect is seen in the Southern Mexico region. Strong SDRE appears over the Yucatan Peninsula where fire AOD peaks (Fig. 6). Regional mean 10-day average of SDRE and SCRE reach  $-4.66$  to  $-0.86 \text{ W m}^{-2}$  and  $-3.02 \text{ W m}^{-2}$  respectively. It's interesting to note that the maximum SCRE tends to center around adjacent Gulf of Mexico rather than the land region. In the central U.S, despite moderate fire aerosol SDRE, ~~SCRE near fire source region is weaker than  $-4 \text{ W m}^{-2}$ , which is comparable to that in the extended regions~~ a positive SCRE exceeding  $2 \text{ W m}^{-2}$  appears in the north part of the region while a comparable negative SCRE appears in the south part of the region.

To find out the causes of the fire aerosol SCRE, fire aerosol-induced changes in cloud properties are analyzed. Given the largely insignificant change in cloud fraction (Fig. 8), the negative fire aerosol SCRE in both regions ~~are~~ is mainly ~~induced by changes associated with increases~~ in liquid water path (LWP) and droplet number concentrations (CDNC). ~~Changes in ice water path (IWP) and ice crystal number concentration (ICNC) can also significantly affect SCRE, but with an opposite sign and mostly in the central U.S. Fire aerosol SCRE in the central U.S. is associated with significant increases in both column integrated droplet number concentration (smaller droplet effective radius) and LWP, indicating important contributions of both the aerosol first and second indirect effects. Increased CDNC enhances cloud albedo by decreasing droplet sizes (Twomey, 1977) and allows more liquid water to accumulate by decreasing precipitation efficiency (Albrecht, 1989; Ghan et al., 2012). Note that although LWP and CDNC over southern Mexico change in a smaller magnitude than those in central U.S., fire aerosol SCRE is stronger over Southern Mexico. This is mainly due to the reductions in IWP and ICNC over the Central U.S. These changes, which possibly caused by fire aerosol induced changes in the circulation (Ten Hoeve et al, 2012), lead to a positive SCRE that partly offsets the negative SCRE caused by changes in warm clouds. The increased CDNC due to an increase of CCN from fire aerosols (Fig. 8) leads to smaller droplet sizes, which in turn increase cloud albedo by enhancing backscattering (Twomey, 1977) and further affect LWP by decreasing precipitation efficiency and allowing more liquid water to accumulate (Albrecht, 1989; Ghan et al., 2012). These changes in warm cloud properties demonstrate important contributions of both aerosol first and second indirect effects to the negative SCRE. Over Southern Mexico, although changes of CDNC and LWP are of comparable magnitudes between Gulf of Mexico and the land region (Fig.8), relative changes of both items are much larger over Gulf of Mexico (Fig.S5)~~



due to the smaller magnitudes of background CDNC and LWP here (Fig. S6), which tend to lead to a more sensitive response of SCRE. That's why the maximum SCRE over Southern Mexico is more centered around Gulf of Mexico. Changes in ice water path (IWP) and ice crystal number concentration (ICNC) can also significantly affect SCRE, but with an opposite sign and mostly in the central U.S. The decreased IWP and ICNC, which are possibly caused by fire aerosol-induced changes in the circulation (Ten Hoeve et al, 2012) and reduced coarse mode dust aerosol concentrations (Fig.S7), are responsible for the positive SCRE and the negative longwave cloud radiative effect (Table S3) in the north part of central U.S. In the south part of central U.S., the reduction of IWP and ICNC also results in a positive SCRE, which partly offsets the negative SCRE resulting from changes in warm cloud properties. This explains the weaker total negative SCRE in this region compared to the Southern Mexico region despite the more substantial increase in CDNC and LWP here. In the northeast of the extended coastal regions, a more significant change of LWP comparable to that in the central U.S appears, while a more significant change of CDNC comparable to that in Southern Mexico occurs in the southwest. The combined effect leads to the total fire aerosol effect in the extended regions.

The ensemble method provides another effective way to distinguish fire aerosol radiative effect by comparing the radiative forcing distribution of ensemble members between simulation with and without fire emission. A significant difference in the distribution of total aerosol (cloud) forcing indicates a significant fire aerosol direct (cloud) effect. As shown in Fig. 9, a shift towards stronger magnitude occurs to the total aerosol forcing when fire aerosols are considered. Simulation E\_QF has a larger percentage of grid cells with SDRE below  $-4.2\text{ W m}^{-2}$ , while more grid cells exceed  $-4.2\text{ W m}^{-2}$  in E\_NF, which indicates a significant negative fire aerosol direct effect. The same shift also appears to the total shortwave cloud forcing with more grid cells having shortwave cloud forcing below  $-30\text{ W m}^{-2}$  in the simulation E\_QF. Regional mean total aerosol and shortwave cloud forcing in southern Mexico become more negative ( $-0.86$  and  $-3.02\text{ W m}^{-2}$ ) with fire aerosols.

Fig. 10 illustrates ensemble behavior of 10-day average regional mean total aerosol and cloud forcing from all simulations as well as resulted fire aerosol SDRE and SCRE. The GFED forced simulations not only resemble in ensemble mean, but also have small difference in ensemble member distribution. Although members in the E\_QF simulation capture stronger aerosol forcing, thus stronger fire aerosol SDRE than those in E\_GF3 and E\_GF4, the ensemble spread (as indicated by the maximum and minimum values) in the three simulations is similar. Moreover, the E\_QF simulation yields a smaller spread of SCRF compared with the GFED forced simulations despite a stronger ensemble mean SCRF. In each fire simulation, ensemble mean fire aerosol SCRE has a much larger magnitude than SDRE. So is the corresponding ensemble spread. Taking results from E\_QF simulation as an example, ensemble spread of SCRE reaches  $0.47\text{ W m}^{-2}$ , accounting for 15.6% of the corresponding ensemble mean, while ensemble spread of SDRE is  $0.03\text{ W m}^{-2}$  accounting for 3.5% of the corresponding ensemble mean.

### 3.3 Daily RF

The fire aerosol effect is also investigated for individual days. The spatial distributions of SDRF and SCRF on April 7 are shown in Fig 11, when relatively high fire emissions appear in both regions. Negative fire aerosol SDRE appears in the central U.S. biomass-burning region indicating the dominant role of POM scattering. Fire aerosol SDRE over

Southern Mexico shows a contrast of warming effect in land region and cooling effect in adjacent ocean despite similar aerosol loading in the two regions. However, they do have nearly equal clear-sky BC absorption and POM scattering (Fig. 12). Difference in low-level cloud distributions between two regions leads to different signs of the simulated all-sky SDRE. Over land, when clouds appear under elevated aerosol layers, more solar radiation is reflected back to space and this leads to amplified BC absorption and more positive direct aerosol forcing (Keil and Haywood, 2003; Zhang et al., 2016; Jiang et al., 2016). In contrast, neither absorption nor scattering changes significantly from clear-sky to all-sky condition over adjacent areas over the ocean, since the small cloud fraction is small. Same enhanced absorption of above-cloud aerosols is also found over the west Atlantic Ocean. Fire aerosols produce remarkable negative SCRE up to  $-16\text{W m}^{-2}$  over Southern Mexico land in response to the increase in CDNC and LWP.

### 3.4 Discussion about Simulation Strategy

Fig. 13 shows the daily variation of the regional mean total (direct) aerosol forcing and cloud forcing. Both the ensemble mean and spread are investigated here. The total aerosol forcing exhibits considerable diversity across ensemble members within each simulation even though the simulated AOD is nearly indistinguishable (Fig. 3). Taking results from simulation E\_QF as an example, maximum values of difference between members exceed  $0.4\text{W m}^{-2}$  for aerosol forcing and  $5\text{W m}^{-2}$  for cloud forcing, which are approximate 10% of the corresponding ensemble mean values. The large spread of total aerosol forcing and cloud forcing will lead to uncertainties in the estimation of fire aerosol effect. This points out the importance of conducting ensemble simulations in order to get a more comprehensive estimate of daily fire aerosol effect. The minimum ensemble size required for this case is investigated in terms of the ensemble mean and spread estimate. Simulated ensemble mean fire aerosol SDRE remains nearly unchanged regardless of the ensemble size (Fig. 14a). However, discrepancies in the ensemble mean fire aerosol SCRF (Fig. 14b) are substantial when the number of ensemble members is smaller than 8. The same is true for the ensemble spread of fire aerosol SCRF (Fig. S85). Overall, the time evolution and magnitude of ensemble mean and spread tend to converge when the number of ensemble members reaches about 9 for different days we investigated here. In order to quantify the discrepancies of the simulated SCRE, we chose the ensemble mean SCRE in the 20-member simulation as a reference and use the root mean square errors (RMSE) of the ensemble mean SCRE in the N-member simulation to quantify the deviation of the simulated SCRE from the reference value. It is calculated as the standard deviation of the differences between the daily ensemble mean SCRE in the N-member simulation and the 20-member simulation. For each N, we randomly sampled 1000 times from the 20 members to help reduce the influence from limited sampling. Figure 15 shows that both the RMSE of ensemble mean SCRE and the difference of RMSE between the 1000 groups of simulations (for each N) decrease with increasing N. The minimum number of N required is determined when the 90<sup>th</sup> percentile of RMSE is smaller than a threshold RMSE. Without a good reference, we set the threshold RMSE to 20% ( $0.566\text{Wm}^{-2}$ ) of the reference 10-day mean SCRE ( $-2.83\text{Wm}^{-2}$ ). As shown in Fig.15, at least 11 members are needed to meet this criterion.

Fire aerosol sources are often intermittent and height-dependent and there is a need to estimate the short-term effective aerosol forcing. Although nudging helps to constrain large-scale features, the simulated cloud properties (e.g. cloud fraction and LWP) and their response to aerosol changes can still be sensitive to small perturbations in the



atmospheric state. Therefore, for investigating the short-term aerosol effect, a single simulation might not be sufficient to tell whether the aerosol effect is significant. The use of ensembles provides an effective way to estimate the uncertainty. Previous investigations of short-term fire aerosol effect are mainly based on single-member simulations (Wu et al., 2011; Sena et al., 2013; Kolusu et al., 2015). While this might be less a problem for SDRE, one should be more careful when investigating the aerosol indirect effect and conduct ensemble simulations to see whether the estimated fire aerosol effects are robust.

#### 4. Summary

In this study, we investigated the short-term effect of fire aerosols on cloud and radiation using CAM5 simulations. Month-long single-member simulations and 10-day ensemble simulations were conducted in April, 2009. In order to help extract signals on short time scales, we used nudging to constrain horizontal winds in all simulations. Our investigation focused on Southern Mexico where there were constant intensive fire activities and the Central U.S. with occasionally large fires. Apart from the local effect, fire emissions from the two regions are shown to affect downwind coastal regions through transport.

Modeled AOD and mass concentrations (BC and POM) were evaluated against observations. In general, all simulations with fire emissions reproduce the observed temporal variation of daily mean AOD well, although the simulated magnitude is smaller. The model performance is better when QFEDv2.4 is used, which has larger fire emissions. Modeled regional mean AOD values in simulations using two versions of GFED fire emission data are barely distinguishable, despite the inclusion of small fires and changed injection heights in GFEDv4.1 used in this study. Both ~~of them~~ simulate about a factor of 1.5 smaller AOD than that in the simulation using the QFED fire emissions. At sites in the downwind region, the modeled BC and POM mass concentrations in the simulation with QFEDv2.4 emission (S\_QF) agree well with the IMPROVE data. In contrast, simulations with the other two fire emission datasets (S\_GF3 and S\_GF4) have a low bias. The simulated AOD in the source region in S\_QF also agrees well with the AERONET data (Cart\_Site). If there is no large compensating error in the model, QFEDv2.4 seems more reasonable in terms of the total (vertically-integrated) emission rate. On the other hand, S\_QF strongly overestimates BC and POM concentrations in the source region. Considering that the source-region AOD and the downwind surface mass concentrations are well simulated, the overestimation suggests the actual emission peak might appear at higher levels compared to the height-dependent injection rates applied in the S\_QF simulation.

Based on the evaluation, we chose the first 10 days as the simulation period and focused on the simulation with QFEDv2.4 fire emission in our ensemble nudged simulations. In our method, the nudged ensembles are generated by adding a very weak temperature nudging along with horizontal-wind nudging and perturbing the nudging time scale of temperature gently. In this way, small temperature perturbations are added to the simulation at each time step, while the large-scale circulation features are very similar between individual members. We first investigated the 10-day mean effective fire aerosol forcing. Decomposition of total aerosol radiative forcing shows that fire aerosol effects in the two selected regions are dominated by the ~~shortwave-cloud-radiative-effect~~ SCRE. All fire simulations show similar spatial distribution of SDRE and SCRE, but with different magnitudes and statistically significant regions. The similarity in the spatial distribution is expected since the three emission datasets differ mainly in the emission

magnitude and no much in spatial distribution in the focus regions of this study. Fire aerosol effects in simulations with GFED emissions (E\_GF3 and E\_GF4) are weaker than that with QFEDv2.4 emission (E\_QF) by a factor of 1.5 for SCRE and a factor of more than 4 for SDRE. ~~Generally speaking, Overall,~~ the difference in simulated AOD and fire aerosol indirect radiative effects between simulations is smaller compared to the difference between fire emissions, consistent with the findings in sub-Saharan African biomass-burning region (Zhang et al. 2014).

Fire aerosols produce a negative direct effect of  $-0.1 \text{ W m}^{-2}$  in the Central U.S. and  $-0.86 \text{ W m}^{-2}$  in Southern Mexico in E\_QF during the 10-day period. Within each region, negative fire aerosol SDRE peaks where fire AOD reaches maximum. Unlike the limited area affected by significant fire aerosol SDRE, fire aerosol SCRE from selected regions spreads eastward and northward, affecting remote coast regions. Ensemble mean results show strong SCRE over almost the entire Southern Mexico, with a 10-day regional mean value of  $-3.02 \text{ W m}^{-2}$ . Over the central U.S, the SCRE is positive in the north and negative in the south and the regional mean is small ( $-0.56 \text{ W m}^{-2}$ ). Maximum SCRE stays below  $-4 \text{ W m}^{-2}$  in the (south) central U.S. and  $-10 \text{ W m}^{-2}$  in Southern Mexico in response to significantly increased LWP and CDNC. Decreases of IWP and ICNC also contribute to fire aerosol SCRE in the Central U.S. but with an opposite sign. The offset effect of the positive forcing induced by changes in cloud ice properties explains the smaller SCRE in the central U.S. despite the larger changes in cloud droplet properties.

We also investigated fire aerosol effects on the daily time scale, where the variation in the simulated fire aerosol effect can be large among the ensemble members. The large ensemble spread of total aerosol and cloud forcing indicates large uncertainties in estimating daily fire aerosol effects, despite similar AOD across ensemble members. Further investigations show that the simulated ensemble mean and spread with less than 7 members differs considerably to those with more members. ~~A minimum of 9 members is necessary to achieve a steady estimate of the magnitude and temporal variation of SCRE in this case.~~ Our results suggest that for short-term simulations of aerosol and cloud processes, even small perturbations might result in large difference across members despite constrained large scale features. In order to obtain a robust estimate of the effective fire aerosol forcing during a short period, it is important to conduct ensemble simulations with sufficient ensemble members.

## Acknowledgments

We thank two anonymous reviewers for their careful reviews and suggestions that helped to greatly improve the analyses and discussion presented in this paper. This study was supported primarily by the U.S. Department of Energy (DOE)'s office of Science as part of the Regional and Global Climate Modeling Program (NSF-DOE-USDA EaSM2). The work was also supported by the National Natural Science Foundation of China (NSFC) under Grants No. 41621005 and 41330420, the National Key Basic Research Program (973 Program) of China under Grant No. 2010CB428504, and the Jiangsu Collaborative Innovation Center of Climate. The Pacific Northwest National Laboratory (PNNL) is operated for DOE by Battelle Memorial Institute under contract DE-AC05-76RL01830.

477 Computations were performed using resources of the National Energy Research Scientific Computing Center  
478 (NERSC) at Lawrence Berkeley National Laboratory and PNNL Institutional computing. All model results are  
479 available from the corresponding author upon request.

## References:

- Albrecht, B. A.: Aerosols, cloud microphysics, and fractional cloudiness, *Science*, 245, 1227-1231, 1989.
- Benedetti, A., Morcrette, J. J., Boucher, O., Dethof, A., Engelen, R., Fisher, M., Flentje, H., Huneeus, N., Jones, L., and Kaiser, J.: Aerosol analysis and forecast in the European centre for medium-range weather forecasts integrated forecast system: 2. Data assimilation, *Journal of Geophysical Research: Atmospheres*, 114, 2009.
- Bond, T. C., Doherty, S. J., Fahey, D., Forster, P., Berntsen, T., DeAngelo, B., Flanner, M., Ghan, S., Kärcher, B., and Koch, D.: Bounding the role of black carbon in the climate system: A scientific assessment, *Journal of Geophysical Research: Atmospheres*, 118, 5380-5552, 2013.
- Bony, S., Colman, R., Kattsov, V. M., Allan, R. P., Bretherton, C. S., Dufresne, J.-L., Hall, A., Hallegatte, S., Holland, M. M., and Ingram, W.: How well do we understand and evaluate climate change feedback processes?, *Journal of Climate*, 19, 3445-3482, 2006.
- Boucher, O., Randall, D., Artaxo, P., Bretherton, C., Feingold, G., Forster, P., Kerminen, V.-M., Kondo, Y., Liao, H., and Lohmann, U.: Clouds and aerosols, in: *Climate change 2013: the physical science basis. Contribution of Working Group I to the Fifth Assessment Report of the Intergovernmental Panel on Climate Change*, Cambridge University Press, 571-657, 2013.
- Brito, J., Rizzo, L. V., Morgan, W. T., Coe, H., Johnson, B., Haywood, J., Longo, K., Freitas, S., Andreae, M. O., and Artaxo, P.: Ground-based aerosol characterization during the South American Biomass Burning Analysis (SAMBBA) field experiment, *Atmospheric Chemistry and Physics*, 14, 12069-12083, 2014.
- Chen, D., Liu, Z., Schwartz, C. S., Lin, H.-C., Cetola, J. D., Gu, Y., and Xue, L.: The impact of aerosol optical depth assimilation on aerosol forecasts and radiative effects during a wild fire event over the United States, *Geoscientific Model Development*, 7, 2709-2715, 2014.
- Chubarova, N., Nezval, Y., Sviridenkov, I., Smirnov, A., and Slutsker, I.: Smoke aerosol and its radiative effects during extreme fire event over Central Russia in summer 2010, *Atmospheric Measurement Techniques*, 5, 557-568, 2012.
- Chubarova, N. Y., Prilepsky, N. G., Rublev, A. N., and Riebau, A. R.: A Mega-Fire event in central Russia: fire weather, radiative, and optical properties of the atmosphere, and consequences for subboreal forest plants, *Developments in environmental science*, 8, 247-264, 2008.
- Dee, D., Uppala, S., Simmons, A., Berrisford, P., Poli, P., Kobayashi, S., Andrae, U., Balmaseda, M., Balsamo, G., and Bauer, P.: The ERA-Interim reanalysis: Configuration and performance of the data assimilation system, *Quarterly Journal of the royal meteorological society*, 137, 553-597, 2011.
- Eskes, H., Huijnen, V., Arola, A., Benedictow, A., Blechschmidt, A.-M., Botek, E., Boucher, O., Bouarar, I., Chabrillat, S., and Cuevas, E.: Validation of reactive gases and aerosols in the MACC global analysis and forecast system, *Geoscientific model development*, 8, 3523-3543, 2015.

Ghan, S. J., Liu, X., Easter, R. C., Zaveri, R., Rasch, P. J., Yoon, J.-H., and Eaton, B.: Toward a minimal representation of aerosols in climate models: Comparative decomposition of aerosol direct, semidirect, and indirect radiative forcing, *Journal of Climate*, 25, 6461-6476, 2012.

Ghan, S. J.: Technical Note: Estimating aerosol effects on cloud radiative forcing, *Atmos. Chem. Phys.*, 13, 9971-9974, doi:10.5194/acp-13-9971-2013, 2013.

Giglio, L., Randerson, J. T., and van der Werf, G. R. (2013), Analysis of daily, monthly, and annual burned area using the fourth-generation global fire emissions database (GFED4) *J. Geophys. Res. Biogeosci.*, 118, 317–328, doi:10.1002/jgrg.20042.

Holben, B. N., Eck, T., Slutsker, I., Tanre, D., Buis, J., Setzer, A., Vermote, E., Reagan, J., Kaufman, Y., and Nakajima, T.: AERONET—A federated instrument network and data archive for aerosol characterization, *Remote sensing of environment*, 66, 1-16, 1998.

Iacono, M. J., Delamere, J. S., Mlawer, E. J., Shephard, M. W., Clough, S. A., and Collins, W. D.: Radiative forcing by long-lived greenhouse gases: Calculations with the AER radiative transfer models, *Journal of Geophysical Research: Atmospheres*, 113, 2008.

Jacobson, M. Z.: Effects of biomass burning on climate, accounting for heat and moisture fluxes, black and brown carbon, and cloud absorption effects, *Journal of Geophysical Research: Atmospheres*, 119, 8980-9002, 2014.

Jiang, Y., Lu, Z., Liu, X., Qian, Y., Zhang, K., Wang, Y., and Yang, X.-Q.: Impacts of global open-fire aerosols on direct radiative, cloud and surface-albedo effects simulated with CAM5, *Atmospheric Chemistry and Physics* (Online), 16, 2016.

Kaufman, Y. J., Koren, I., Remer, L. A., Rosenfeld, D., and Rudich, Y.: The effect of smoke, dust, and pollution aerosol on shallow cloud development over the Atlantic Ocean, *Proceedings of the National Academy of Sciences of the United States of America*, 102, 11207-11212, 2005.

Keil, A., and Haywood, J. M.: Solar radiative forcing by biomass burning aerosol particles during SAFARI 2000: A case study based on measured aerosol and cloud properties, *Journal of Geophysical Research: Atmospheres*, 108, 2003.

Kolusu, S., Marsham, J., Mulcahy, J., Johnson, B., Dunning, C., Bush, M., and Spracklen, D.: Impacts of Amazonia biomass burning aerosols assessed from short-range weather forecasts, *Atmospheric Chemistry and Physics*, 15, 12251-12266, 2015.

Kooperman, G. J., Pritchard, M. S., Ghan, S. J., Wang, M., Somerville, R. C., and Russell, L. M.: Constraining the influence of natural variability to improve estimates of global aerosol indirect effects in a nudged version of the Community Atmosphere Model 5, *Journal of Geophysical Research: Atmospheres*, 117, 2012.

Korontzi, S., McCarty, J., Loboda, T., Kumar, S., and Justice, C.: Global distribution of agricultural fires in croplands from 3 years of Moderate Resolution Imaging Spectroradiometer (MODIS) data, *Global Biogeochemical Cycles*, 20, 2006.

547 Lin, N.-H., Tsay, S.-C., Maring, H. B., Yen, M.-C., Sheu, G.-R., Wang, S.-H., Chi, K. H., Chuang, M.-T., Ou-Yang,  
 548 C.-F., and Fu, J. S.: An overview of regional experiments on biomass burning aerosols and related pollutants in  
 549 Southeast Asia: From BASE-ASIA and the Dongsha Experiment to 7-SEAS, *Atmospheric Environment*, 78, 1-19,  
 550 2013.

551 Liu, X., Easter, R. C., Ghan, S. J., Zaveri, R., Rasch, P., Shi, X., Lamarque, J.-F., Gettelman, A., Morrison, H., and  
 552 Vitt, F.: Toward a minimal representation of aerosols in climate models: Description and evaluation in the Community  
 553 Atmosphere Model CAM5, *Geoscientific Model Development*, 5, 709, 2012.

554 Liu, X.: Impacts of global open-fire aerosols on direct radiative, cloud and surface-albedo effects simulated with  
 555 CAM5, *Atmos. Chem. Phys.*, 1680, 7324, 2016.

556 Lu, Z., and Sokolik, I. N.: The effect of smoke emission amount on changes in cloud properties and precipitation: A  
 557 case study of Canadian boreal wildfires of 2007, *Journal of Geophysical Research: Atmospheres*, 118, 2013.

558 Magi, B., Rabin, S., Shevliakova, E., and Pacala, S.: Separating agricultural and non-agricultural fire seasonality at  
 559 regional scales, *Biogeosciences*, 9, 3003, 2012.

560 Malm, W. C., Schichtel, B. A., Pitchford, M. L., Ashbaugh, L. L., and Eldred, R. A.: Spatial and monthly trends in  
 561 speciated fine particle concentration in the United States, *Journal of Geophysical Research: Atmospheres*, 109, 2004.

562 Mlawer, E. J., Taubman, S. J., Brown, P. D., Iacono, M. J., and Clough, S. A.: Radiative transfer for inhomogeneous  
 563 atmospheres: RRTM, a validated correlated-k model for the longwave, *Journal of Geophysical Research:*  
 564 *Atmospheres*, 102, 16663-16682, 1997.

565 Morrison, H., and Gettelman, A.: A new two-moment bulk stratiform cloud microphysics scheme in the Community  
 566 Atmosphere Model, version 3 (CAM3). Part I: Description and numerical tests, *Journal of Climate*, 21, 3642-3659,  
 567 2008.

568 Mu, M., Randerson, J., van der Werf, G., Giglio, L., Kasibhatla, P., Morton, D., Collatz, G., DeFries, R., Hyer, E.,  
 569 and Prins, E.: Daily and hourly variability in global fire emissions and consequences for atmospheric model  
 570 predictions of carbon monoxide, 2011.

571 Neale, R. B., Richter, J. H., and Jochum, M.: The impact of convection on ENSO: From a delayed oscillator to a series  
 572 of events, *Journal of Climate*, 21, 5904-5924, 2008.

573 Park, S., and Bretherton, C. S.: The University of Washington shallow convection and moist turbulence schemes and  
 574 their impact on climate simulations with the Community Atmosphere Model, *Journal of Climate*, 22, 3449-3469, 2009.

575 Randerson, J., Chen, Y., Werf, G., Rogers, B., and Morton, D.: Global burned area and biomass burning emissions  
 576 from small fires, *Journal of Geophysical Research: Biogeosciences*, 117, 2012.

577 Reddington, C., Yoshioka, M., Balasubramanian, R., Ridley, D., Toh, Y., Arnold, S., and Spracklen, D.: Contribution  
 578 of vegetation and peat fires to particulate air pollution in Southeast Asia, *Environmental Research Letters*, 9, 094006,  
 579 2014.

580 Richter, J. H., and Rasch, P. J.: Effects of convective momentum transport on the atmospheric circulation in the  
 581 Community Atmosphere Model, version 3, *Journal of Climate*, 21, 1487-1499, 2008.

Rubin, J. I., Reid, J. S., Hansen, J. A., Anderson, J. L., Hoar, T. J., Reynolds, C. A., Sessions, W. R., and Westphal, D. L.: Development of the Ensemble Navy Aerosol Analysis Prediction System (ENAAPS) and its application of the Data Assimilation Research Testbed (DART) in support of aerosol forecasting, *Atmospheric Chemistry and Physics*, 16, 3927, 2016.

Sena, E., Artaxo, P., and Correia, A.: Spatial variability of the direct radiative forcing of biomass burning aerosols and the effects of land use change in Amazonia, *Atmospheric Chemistry and Physics*, 13, 1261-1275, 2013.

[Smirnov, A., Holben, B., Eck, T., Dubovik, O., and Slutsker, I.: Cloud-screening and quality control algorithms for the AERONET database, \*Remote Sensing of Environment\*, 73, 337-349, 2000.](#)

Stier, P., Schutgens, N., Bellouin, N., Bian, H., Boucher, O., Chin, M., Ghan, S., Huneeus, N., Kinne, S., and Lin, G.: Host model uncertainties in aerosol radiative forcing estimates: results from the AeroCom Prescribed intercomparison study, *Atmospheric Chemistry and Physics*, 13, 3245-3270, 2013.

Tarasova, T., Gorchakova, I., Sviridenkov, M., Anikin, P., and Romashova, E.: Estimation of the radiative forcing of smoke aerosol from radiation measurements at the Zvenigorod scientific station in the summer of 2002, *Izvestiya Atmospheric and Oceanic Physics*, 40, 454-463, 2004.

(Dee et al., 2011), J. E., Jacobson, M. Z., and Remer, L. A.: Comparing results from a physical model with satellite and in situ observations to determine whether biomass burning aerosols over the Amazon brighten or burn off clouds, *Journal of Geophysical Research: Atmospheres*, 117, 2012.

Tosca, M., Randerson, J., and Zender, C.: Global impact of smoke aerosols from landscape fires on climate and the Hadley circulation, *Atmospheric Chemistry and Physics*, 13, 5227-5241, 2013.

Twomey, S.: The influence of pollution on the shortwave albedo of clouds, *Journal of the atmospheric sciences*, 34, 1149-1152, 1977.

van der Werf, G. R., Randerson, J. T., Giglio, L., Collatz, G. J., Mu, M., Kasibhatla, P. S., Morton, D. C., DeFries, R. S., Jin, Y., and van Leeuwen, T. T.: Global fire emissions and the contribution of deforestation, savanna, forest, agricultural, and peat fires (1997–2009), *Atmos. Chem. Phys.*, 10, 11707-11735, doi:10.5194/acp-10-11707-2010, 2010.

Ward, D., Kloster, S., Mahowald, N., Rogers, B., Randerson, J., and Hess, P.: The changing radiative forcing of fires: global model estimates for past, present and future, *Atmospheric Chemistry and Physics*, 12, 2012.

Wan, H., Rasch, P. J., Zhang, K., Qian, Y., Yan, H., and Zhao, C.: Short ensembles: an efficient method for discerning climate-relevant sensitivities in atmospheric general circulation models, *Geoscientific Model Development*, 7, 1961-1977, 2014.

Wu, L., Su, H., and Jiang, J. H.: Regional simulations of deep convection and biomass burning over South America: 2. Biomass burning aerosol effects on clouds and precipitation, *Journal of Geophysical Research: Atmospheres*, 116, 2011.

616 Zamora, L. M., Kahn, R., Cubison, M. J., Diskin, G., Jimenez, J., Kondo, Y., McFarquhar, G., Nenes, A., Thornhill,  
 617 K., and Wisthaler, A.: Aircraft-measured indirect cloud effects from biomass burning smoke in the Arctic and  
 618 subarctic, *Atmospheric Chemistry and Physics*, 16, 715-738, 2016.

619 Zhang, F., Wang, J., Ichoku, C., Hyer, E. J., Yang, Z., Ge, C., Su, S., Zhang, X., Kondragunta, S., and Kaiser, J. W.:  
 620 Sensitivity of mesoscale modeling of smoke direct radiative effect to the emission inventory: a case study in northern  
 621 sub-Saharan African region, *Environmental Research Letters*, 9, 075002, 2014.

622 Zhang, G. J., and McFarlane, N. A.: Sensitivity of climate simulations to the parameterization of cumulus convection  
 623 in the Canadian Climate Centre general circulation model, *Atmosphere-ocean*, 33, 407-446, 1995.



Table 1. List of CAM5 simulations.

| Name                               | Fire emission | Simulation period         | Member | Nudging                                       |
|------------------------------------|---------------|---------------------------|--------|-----------------------------------------------|
| Group A: Single member simulations |               |                           |        |                                               |
| S_NF                               | No            | January 1- April 30, 2009 | 1      | Horizontal winds (6h)                         |
| S_GF3                              | GFED v3       |                           |        |                                               |
| S_GF4                              | GFED v4.1     |                           |        |                                               |
| S_QF                               | QFED v2.4     |                           |        |                                               |
| Group B: Ensemble simulations      |               |                           |        |                                               |
| E_NF                               | No            | April 1 - April 10, 2009  | 10     | Horizontal winds (6h) and temperature (~10d)* |
| E_GF3                              | GFED v3       |                           |        |                                               |
| E_GF4                              | GFED v4.1     |                           |        |                                               |
| E_QF                               | QFED v2.4     |                           |        |                                               |

\* See section 2.3 for details about ensembles

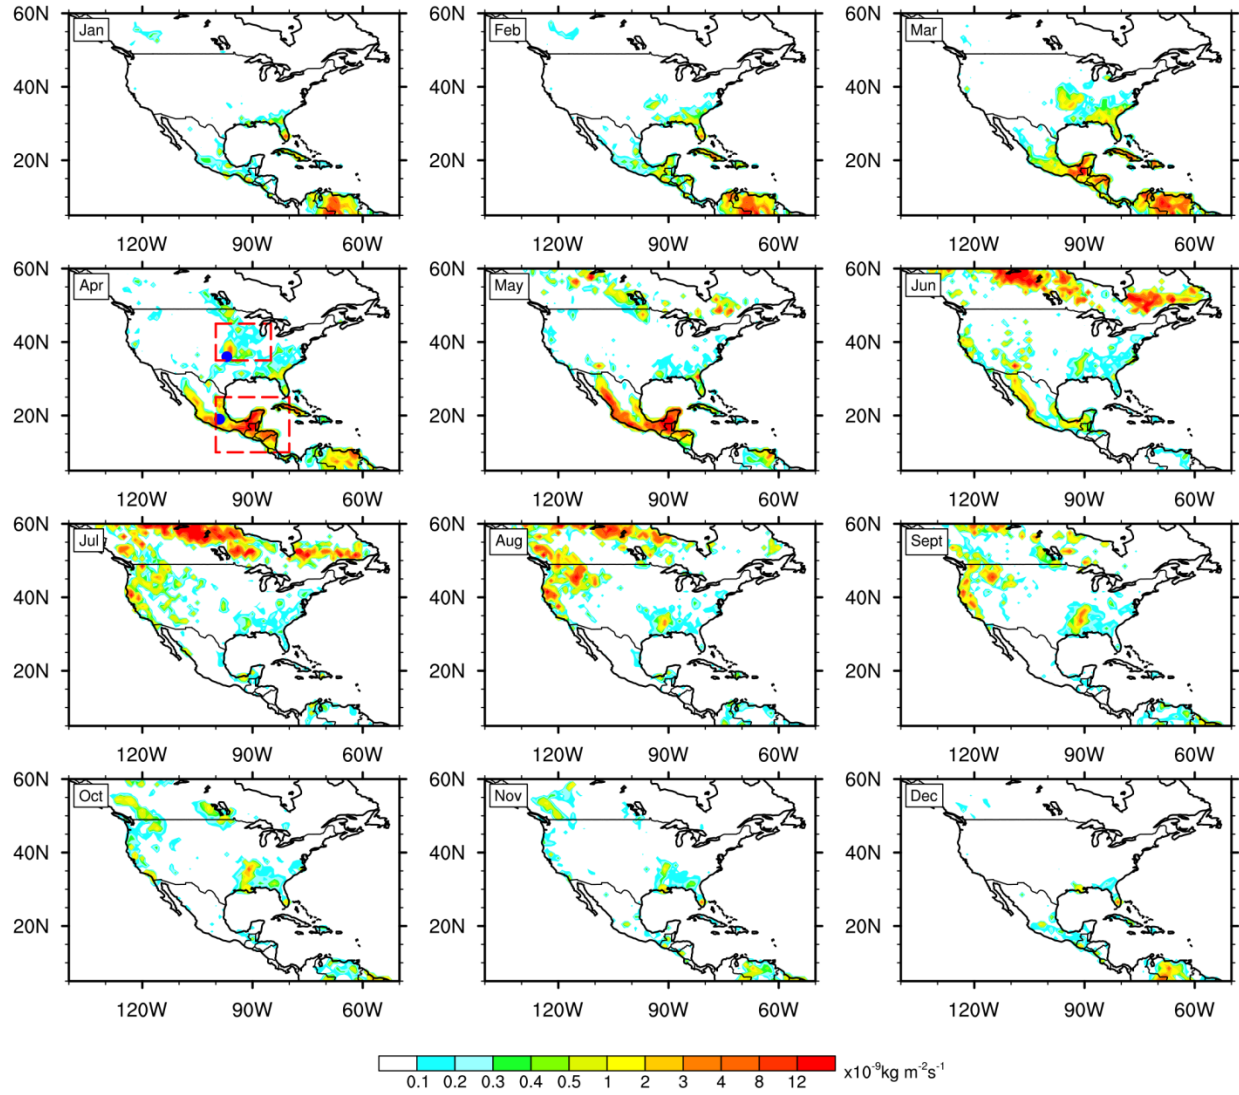

Figure 1. Spatial distributions of multi-year monthly mean biomass burning consumed dry matter over North America during 2003-2014 from GFEDv4.1. Boxes denote selected regions: central U.S. (35 - 45°N, 85 - 100°W) and Southern Mexico (10 - 25°N, 80 - 100°W). Dots denote locations of AERONET sites: Cart\_Site (36°N, 97°W) and Mexico\_City (19°N, 99°W)

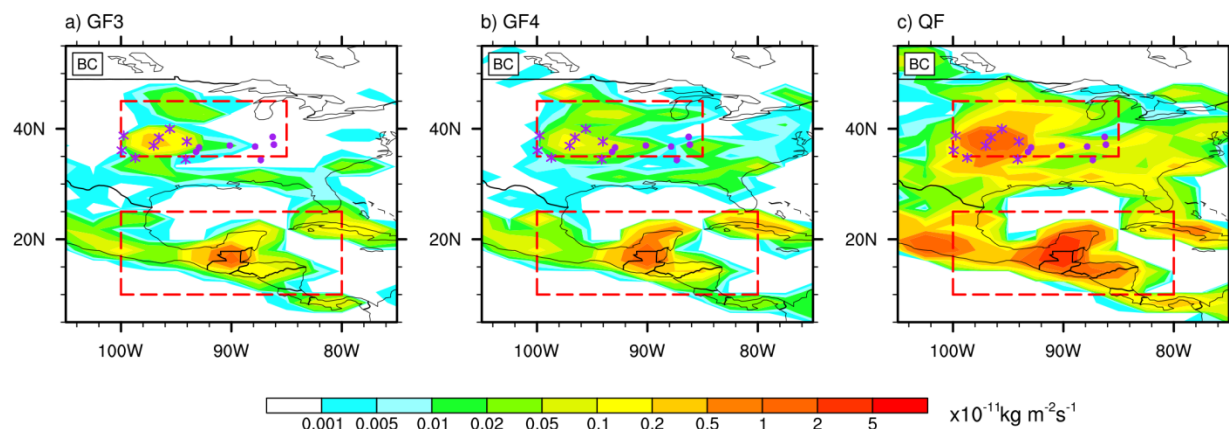

Figure 2. Spatial distributions of monthly mean BC emissions from three emission inventories in April, 2009. IMPROVE data sites are shown as asterisks for sites near the source region and as dots for sites in the region downwind of the fire source.

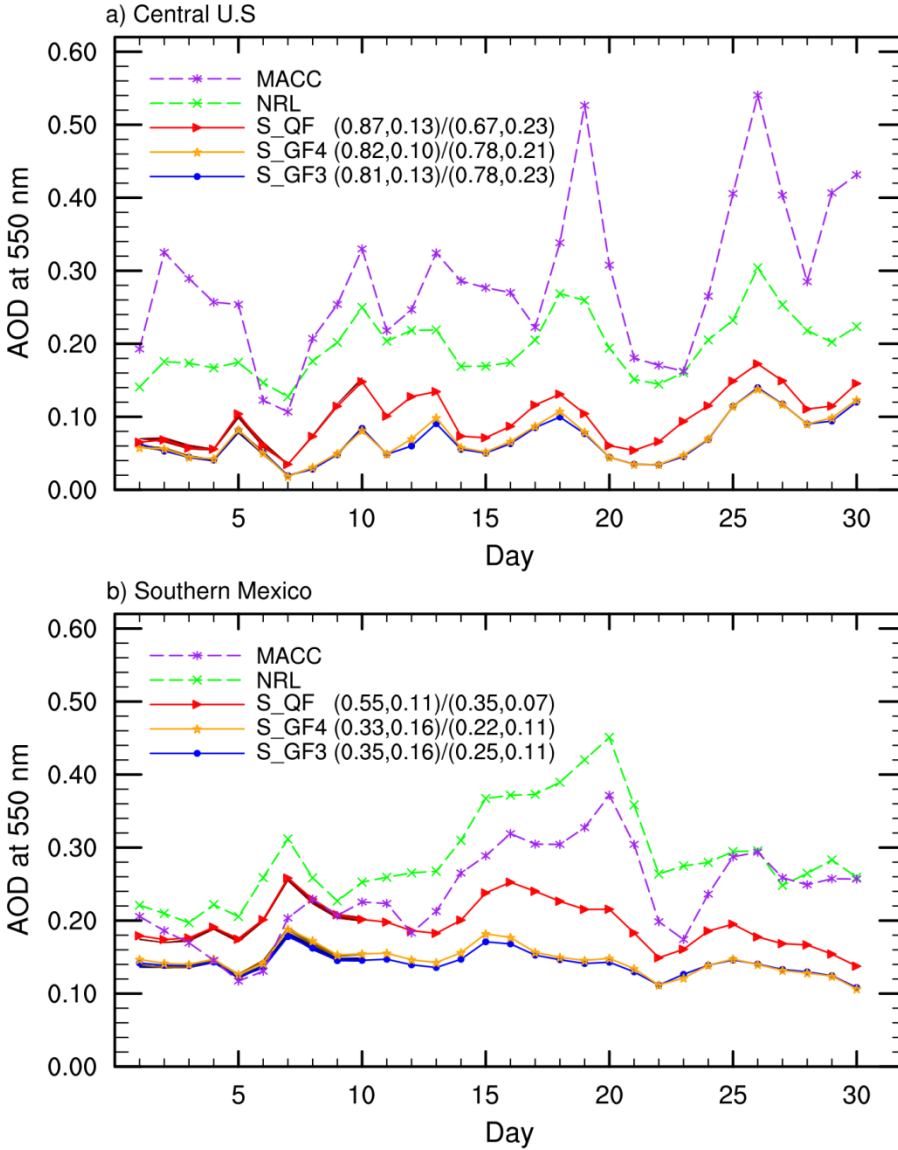

Figure 3. Time series of daily regional mean AOD in April, 2009 in simulations and reanalysis data. Numbers in parenthesis denote [time correlation coefficient \(TCC\)](#) and [root mean square error \(RMSE\)](#) between each simulation in group A and reanalysis data (left: NRL; right: MACC). Individual lines indicate group A simulations. Shaded areas (very narrow) in slightly darker colors during April 1-10 illustrate maximum and minimum values of daily mean AOD among ensemble members in group B simulations. [For the single-member simulation and the ensemble simulation driven by same fire emission, the shaded area and the solid line almost overlap, given the barely indistinguishable AOD between ensemble members and the corresponding Group A simulation.](#)

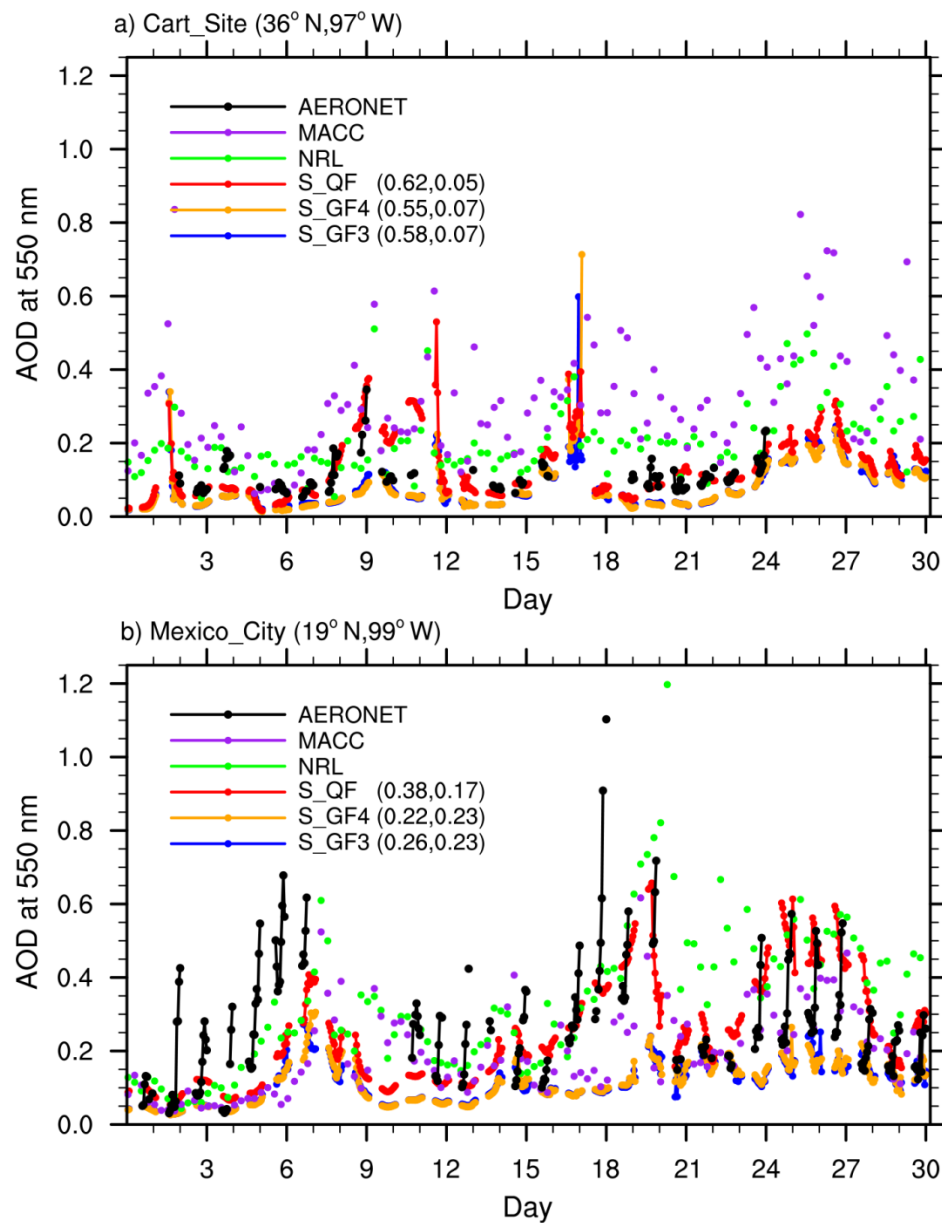

Figure 4. Time series of hourly regional mean AOD in April, 2009 from group A simulations, reanalysis data and AERONET retrievals at AERONET sites. Numbers in parenthesis denote TCC (left) and RMSE (right) between each simulation and AERONET AOD.

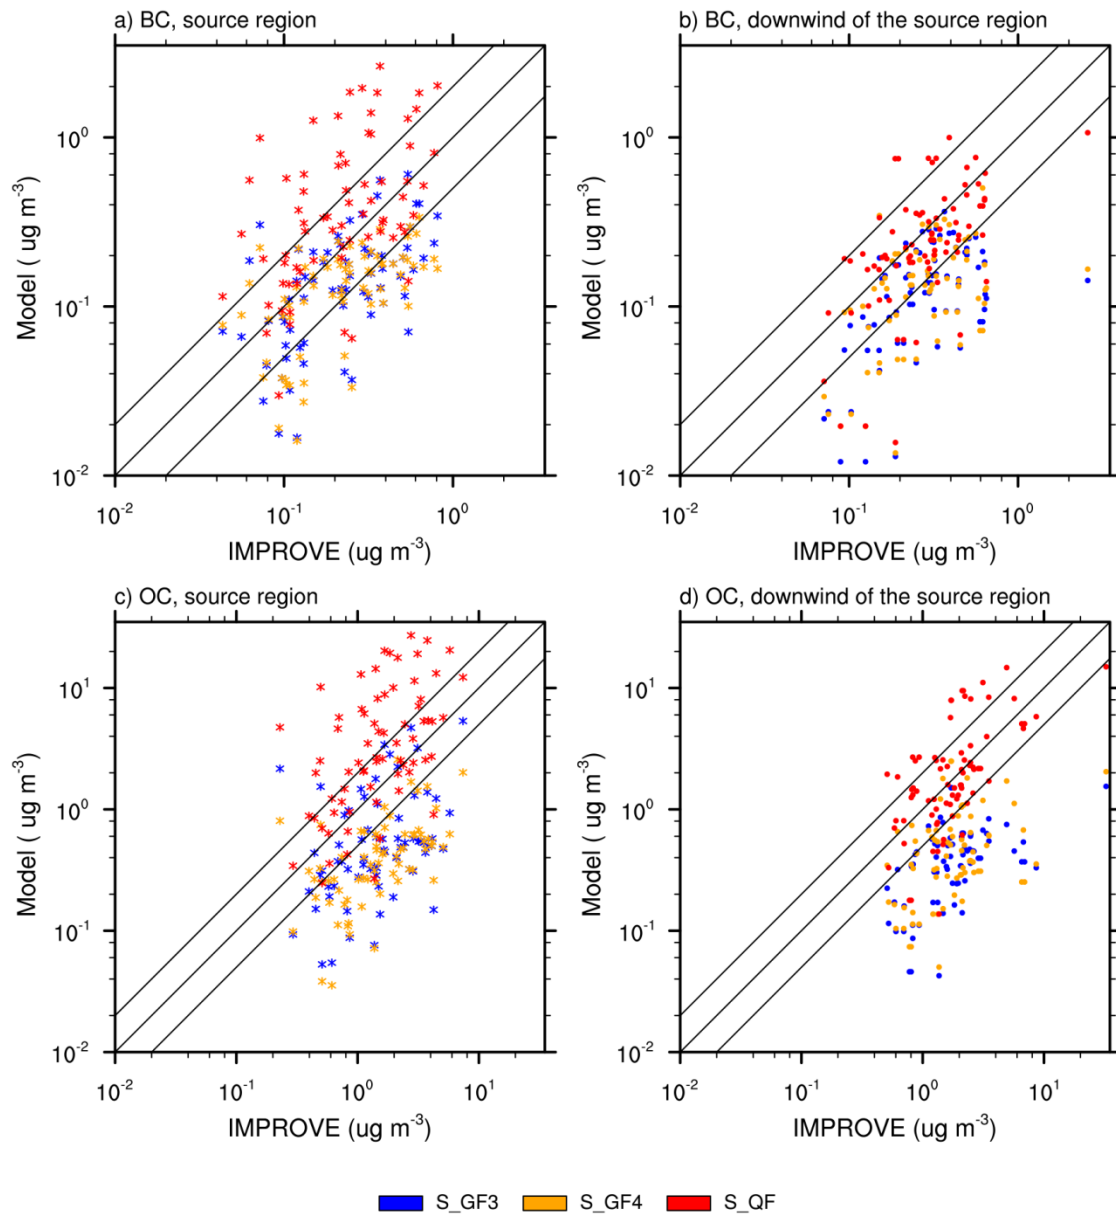

Figure 5. Evaluation of simulated BC (up) and POM (bottom) concentrations in group A simulations against the IMPROVE data at sites near the source and downwind the source region. Locations of these sites are marked with the same symbol in Fig. 2.

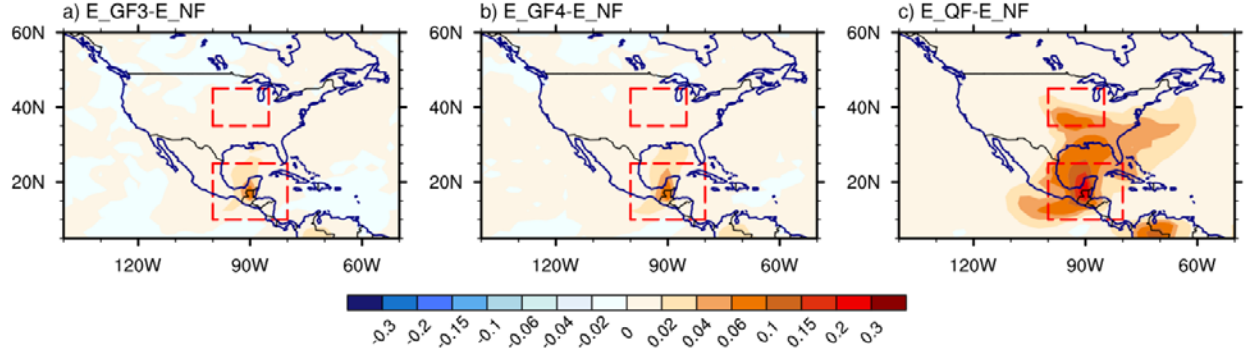

Figure 6. Spatial distributions of 10-day average (Apr. 1-10) ensemble mean AOD differences between simulations with (E\_GF3, E\_GF4, and E\_QF) and without fire emission (E\_NF).

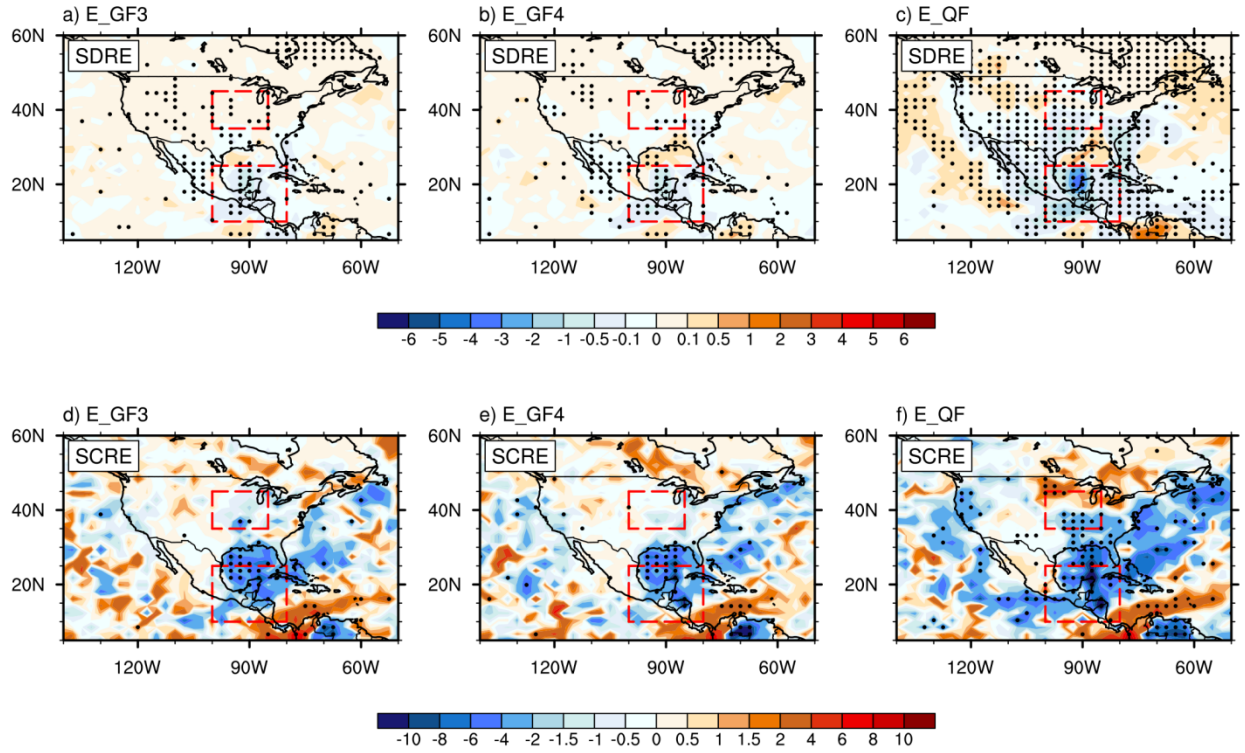

Figure 7. Spatial distributions of 10-day average (Apr. 1-10) ensemble mean fire aerosol shortwave direct radiative effect (SDRE) and shortwave cloud radiative effect (SCRE) ( $W m^{-2}$ ) in group B simulations. Dots denote regions where SDRE is statistically significant at the 95% confidence level based on the [Kolmogorov-Smirnov \(KS\)](#) test.



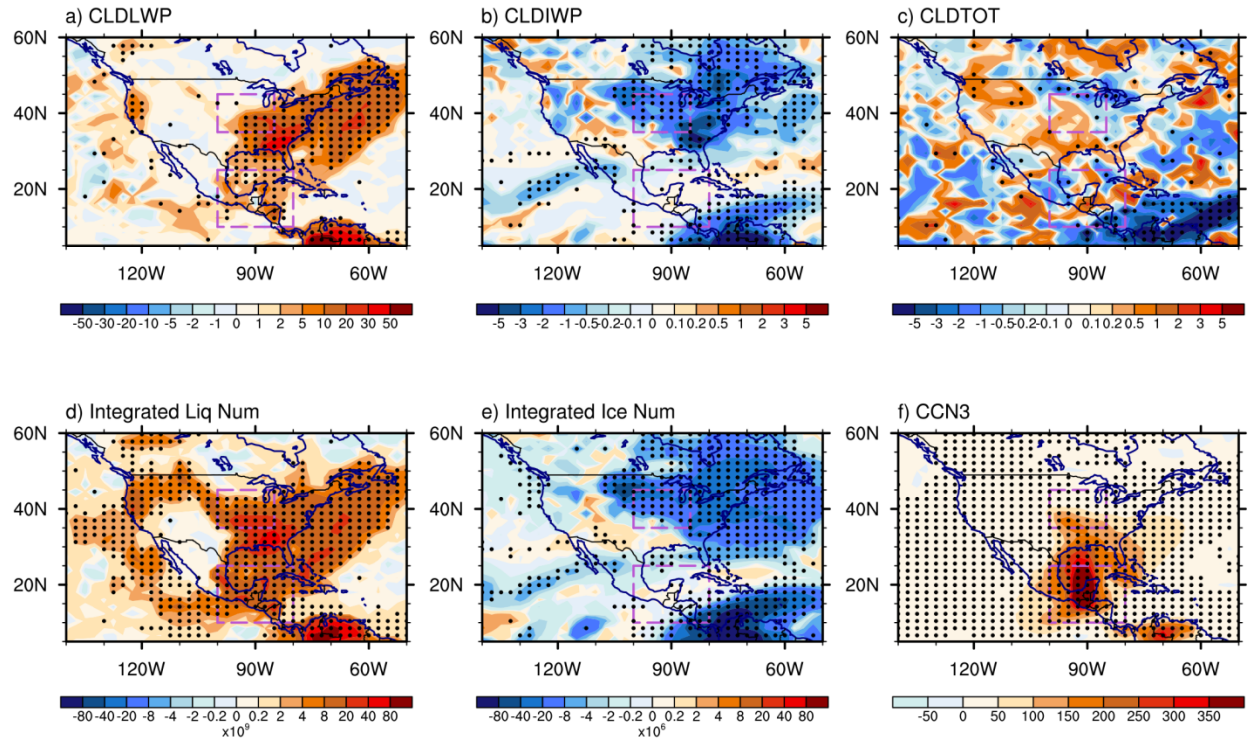

Figure 8. Difference of 10-day average (Apr.1-10) ensemble mean between simulations E\_NF and E\_QF: a) cloud liquid water path ( $\text{g m}^{-2}$ ), b) cloud ice water path ( $\text{g m}^{-2}$ ), c) total cloud fraction (%), d) column-integrated droplet number concentration ( $\text{m}^{-2}$ ), e) column-integrated ice number concentration ( $\text{m}^{-2}$ ), and f) cloud condensation nuclei at 0.1% supersaturation near 900 hPa. Dots denote regions where the difference is statistically significant at the 95% confidence level based on the KS test.



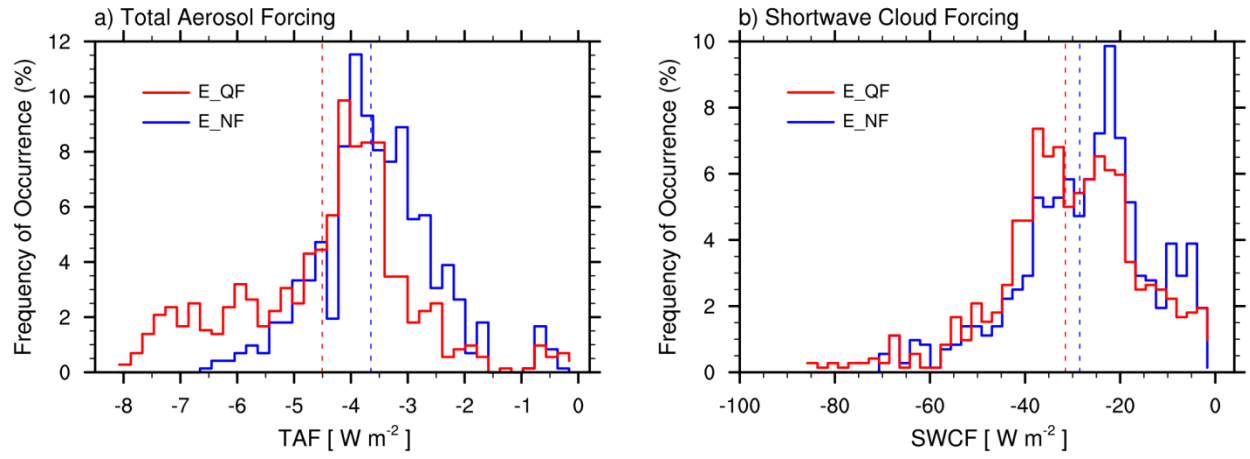

Figure 9. Probability distributions of 10-day average (Apr.1-10) a) total aerosol forcing and b) cloud forcing over Southern Mexico in simulations E\_NF and E\_QF sampled from grid values of ensemble members (72x10 for each case). Dashed lines indicate the mean of the distribution.

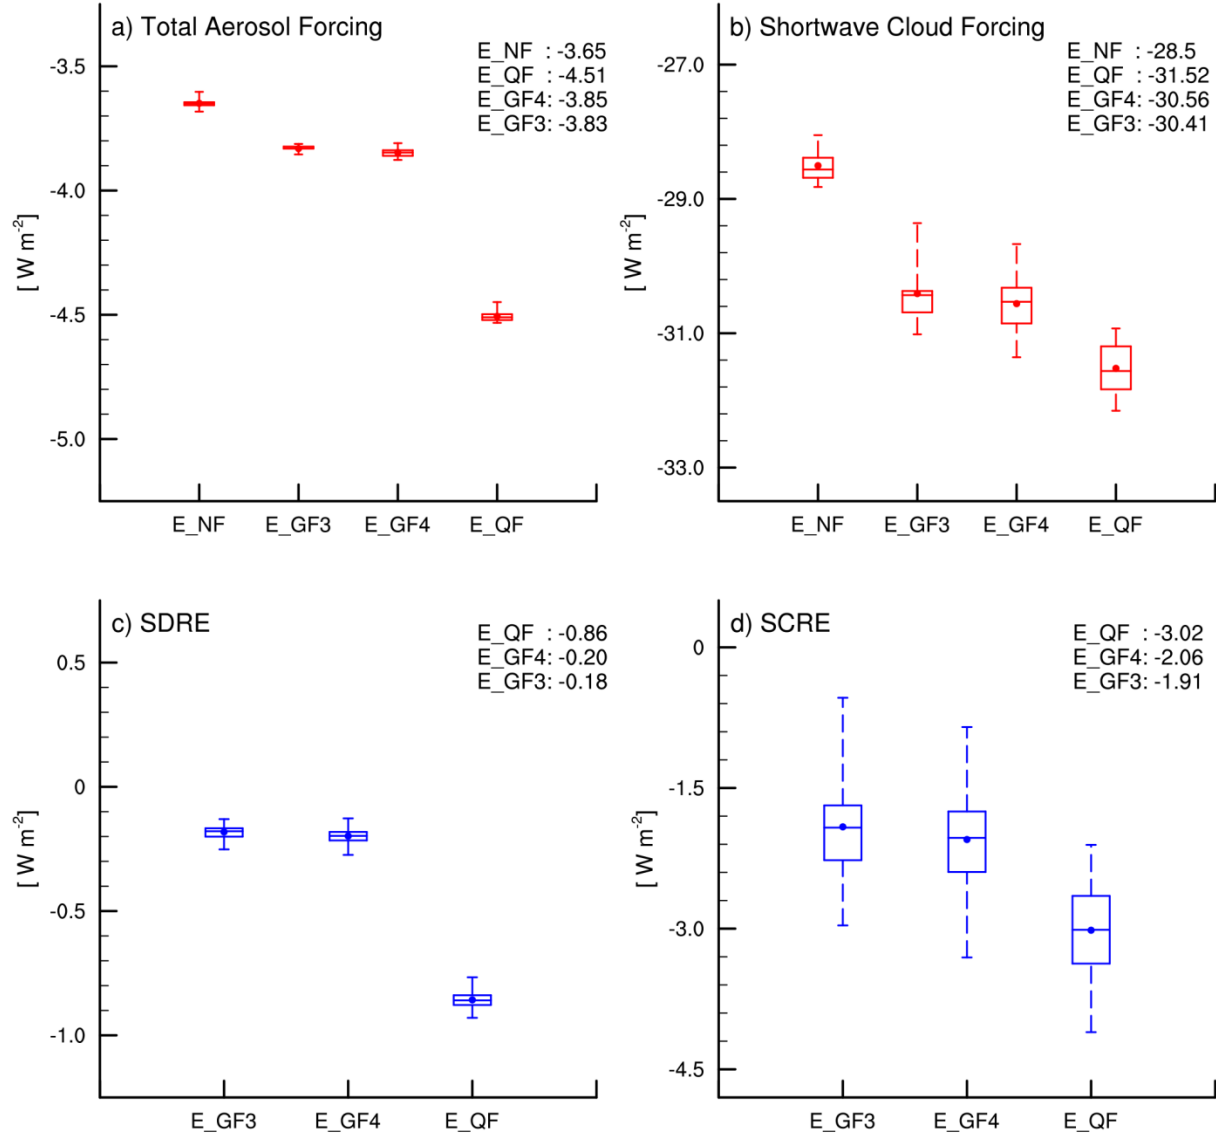

Figure 10. 10-day average (Apr. 1-10) regional mean a) total aerosol [direct](#) forcing, b) total shortwave cloud forcing and fire aerosol, c) SDRE, and d) SCRE in Southern Mexico in group B simulations. Box denotes the 25<sup>th</sup> and 75<sup>th</sup> percentiles. Bars outside the box indicate minimum and maximum. Bar within the box denotes the 50<sup>th</sup> percentile. Total aerosol and cloud forcing are sampled from different ensemble members (10 for each case). Fire aerosol SDRE and SCRF are sampled by calculating the difference between members in simulations E\_QF (E\_GF3/E\_GF4) and E\_NF (10x10 for each case).

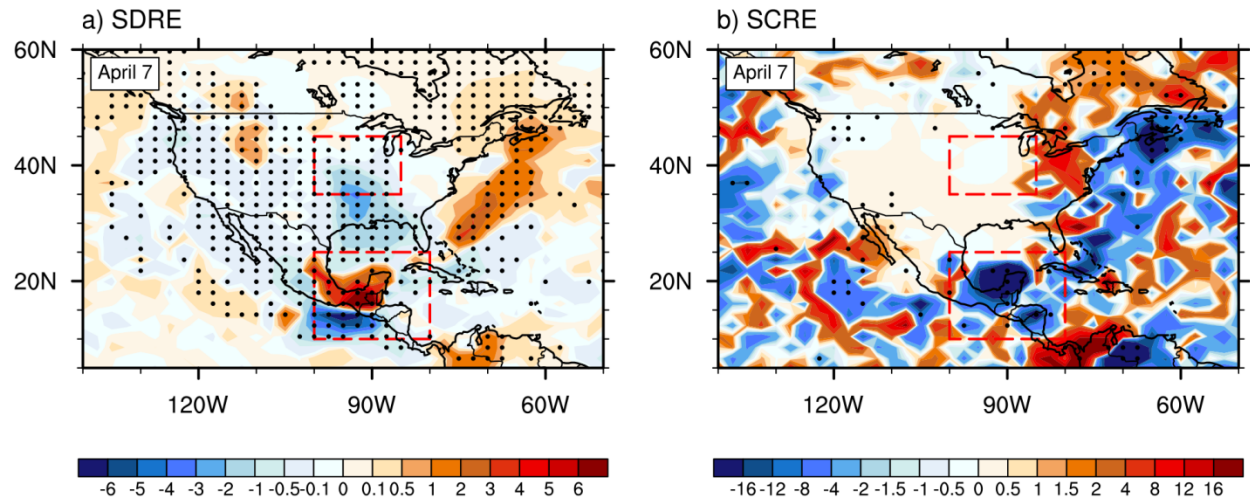

Figure 11. Spatial distributions of ensemble mean fire aerosol a) SDRE and b) SCRE (  $W m^{-2}$  ) on April 7 in the E\_QF simulation. Dots denote grids where fire aerosol effect is statistically significant at the 95% confidence level based on the KS test.

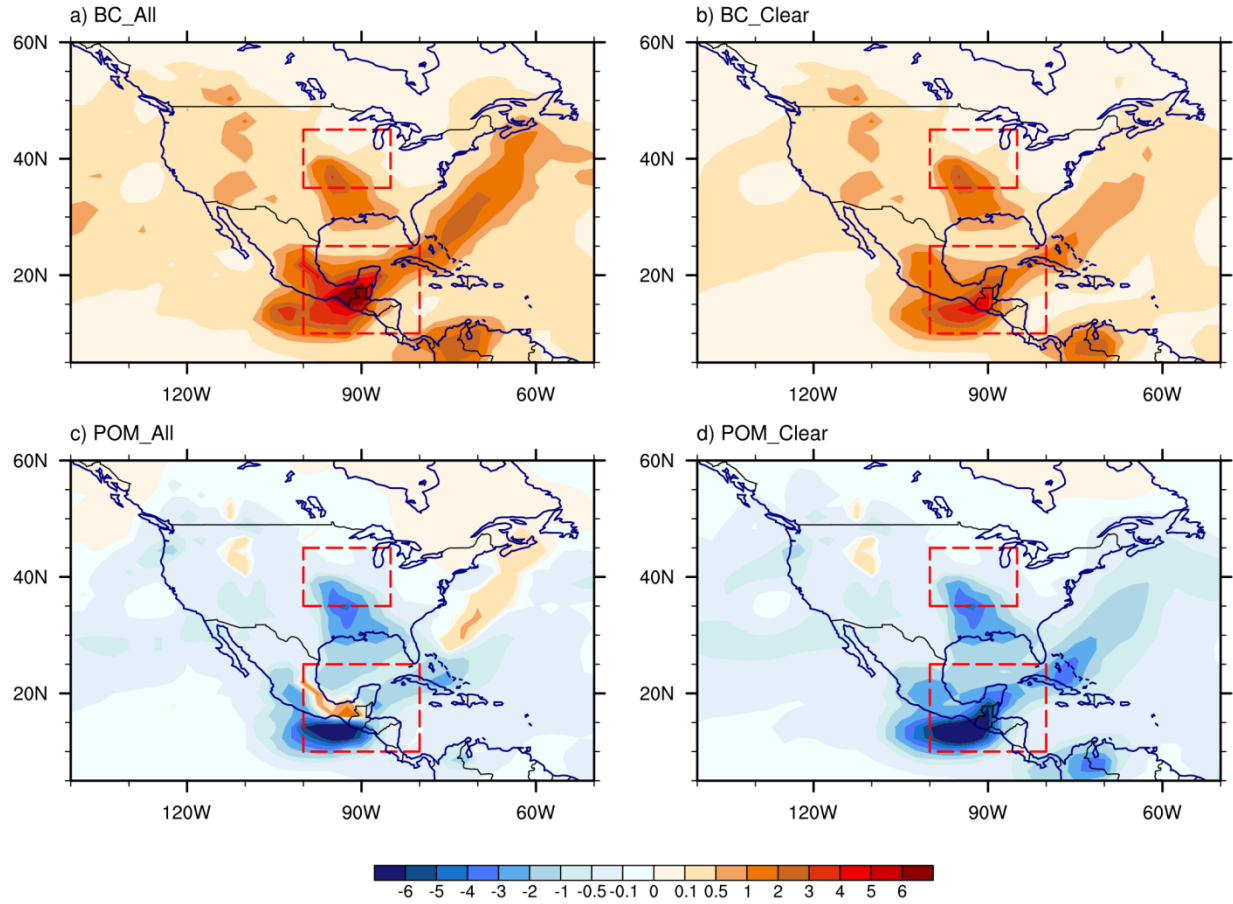

Figure 12. Spatial distributions of fire BC SDRE and fire POM SDRE ( W m<sup>-2</sup> ) on all-sky and clear-sky conditions on April 7 in the E\_QF simulation.

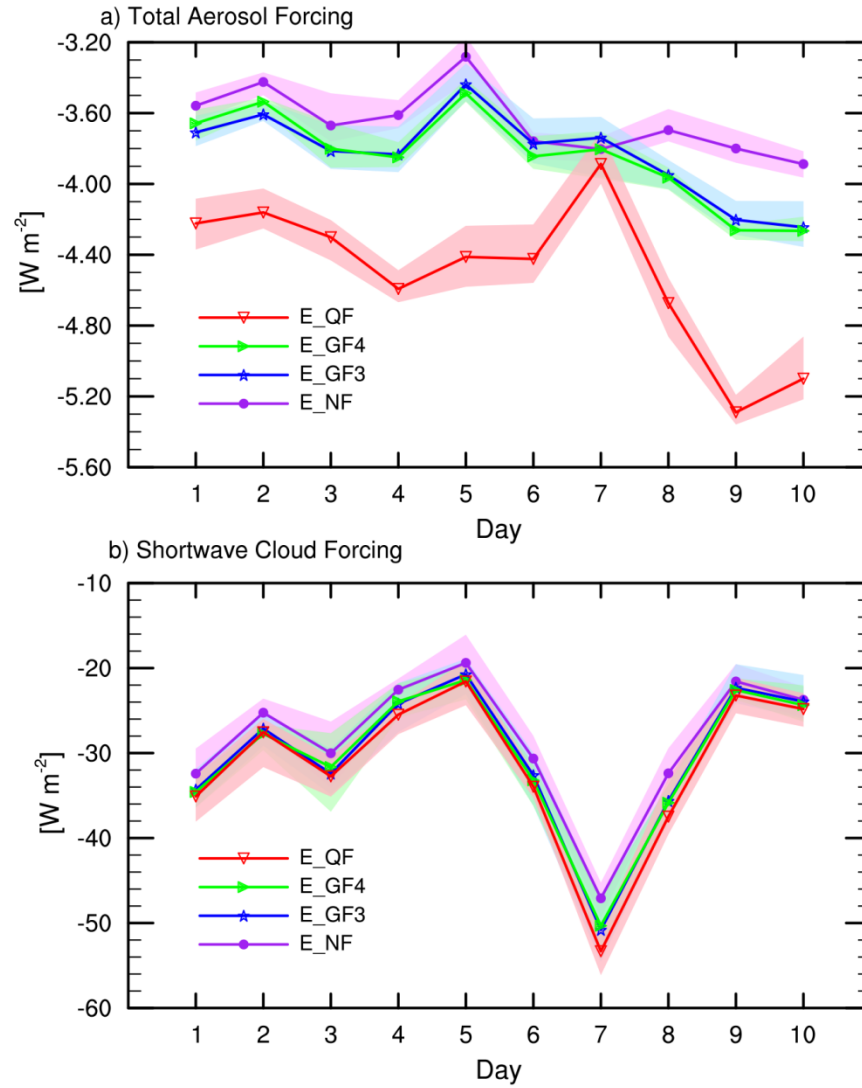

Figure 13. Time series of daily regional mean total a) aerosol forcing and b) cloud forcing in Southern Mexico during Apr.1-10, 2009 in group B simulations. Individual lines indicate ensemble mean values. Shaded areas illustrate the ensemble spread (from minimum to maximum).

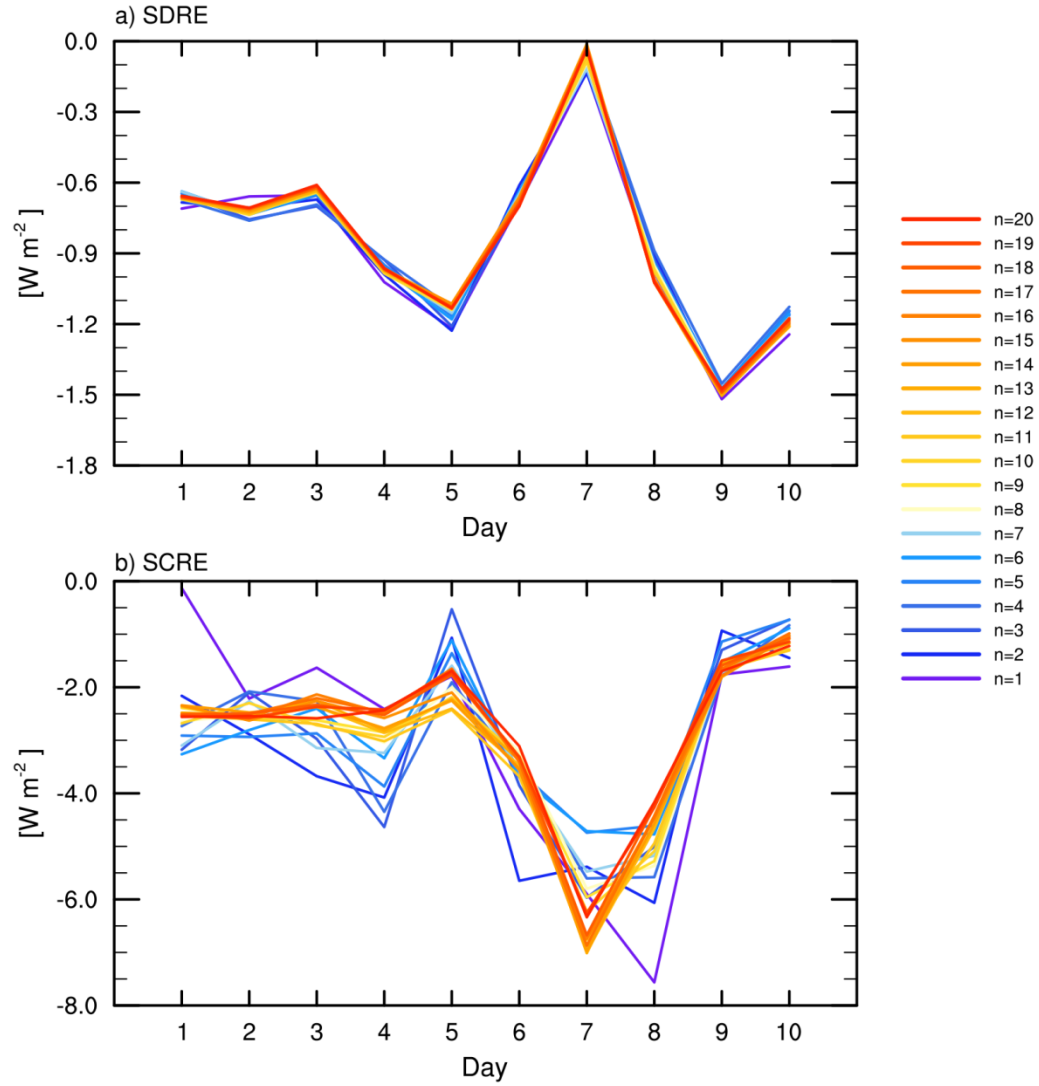

Figure 14. Time series of daily ensemble mean fire aerosol a) SDRE and b) SCRE averaged over Southern Mexico during Apr. 1-10, 2009 in QFED forced ensemble simulations with varying the total number of member numbers ( $n=1-20$ ).

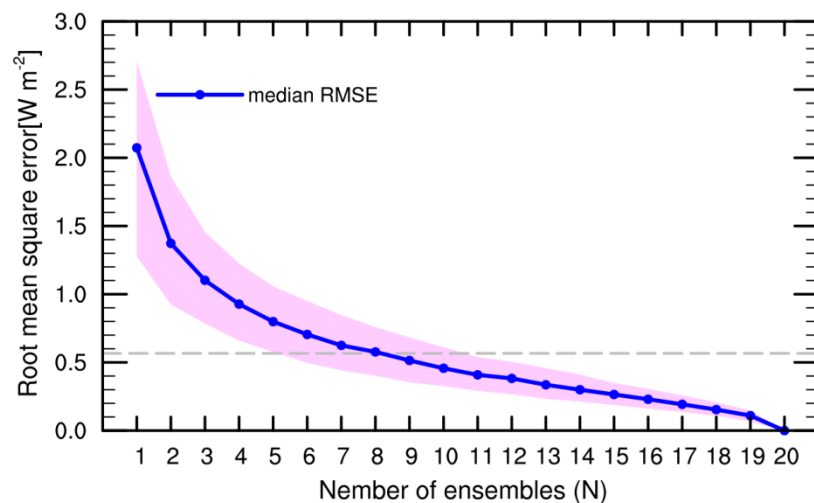

Figure 15 Root mean square errors (RMSE) of the ensemble mean of the regional mean fire aerosol SCRE during April 1-10 over Southern Mexico in simulations with different total number of ensemble members (N). The blue line represents the median RMSE of the 1000 groups (each group has N members/simulations). The grey line represents the threshold RMSE. Shaded area denotes the range between the 10<sup>th</sup> and 90<sup>th</sup> percentiles.

## Supplemental Materials

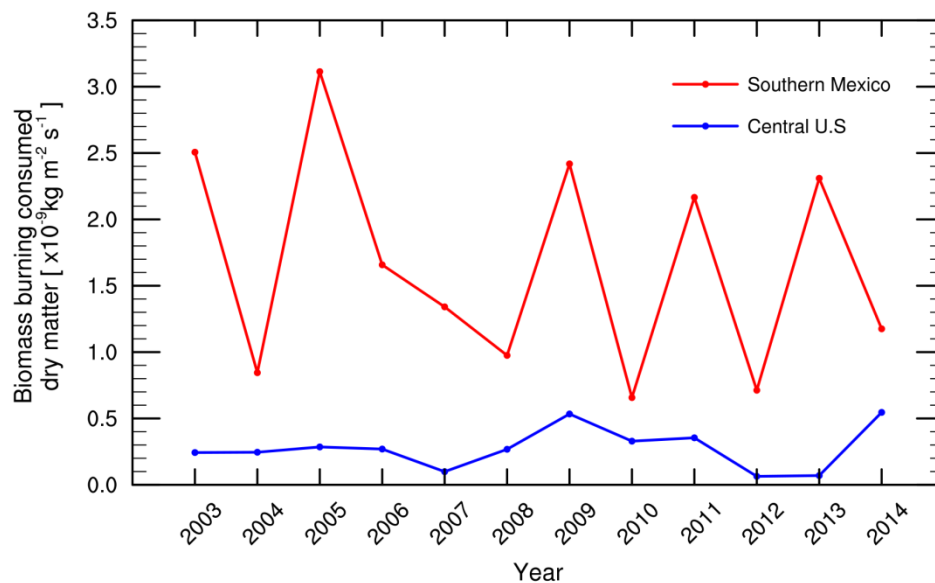

Figure S1. Time series of regional mean biomass burning consumed dry matter during April in central U.S (blue) and Mexico (red) from GFED v4.1.

[Table S1 Regional mean emissions of fire aerosols in April, 2009 from three emission inventories \(Unit:  \$\times 10^{-12}\$  kg m<sup>-2</sup> s<sup>-1</sup>\). Numbers in the parentheses show results averaged in April 1-10.](#)

|                   | <u>BC</u>         |                   | <u>OC</u>           |                     | <u>SO<sub>2</sub></u> |                     |
|-------------------|-------------------|-------------------|---------------------|---------------------|-----------------------|---------------------|
|                   | <u>Central</u>    | <u>Southern</u>   | <u>Central</u>      | <u>Southern</u>     | <u>Central</u>        | <u>Southern</u>     |
|                   | <u>U.S.</u>       | <u>Mexico</u>     | <u>U.S.</u>         | <u>Mexico</u>       | <u>U.S.</u>           | <u>Mexico</u>       |
| <u>GFED v3.1</u>  | <u>0.25(0.38)</u> | <u>0.69(0.82)</u> | <u>1.82(3.58)</u>   | <u>5.60(6.77)</u>   | <u>1.35(2.01)</u>     | <u>3.69(4.35)</u>   |
| <u>GFED v4.1s</u> | <u>0.23(0.34)</u> | <u>1.17(1.44)</u> | <u>1.75(3.24)</u>   | <u>8.80(10.76)</u>  | <u>1.21(1.81)</u>     | <u>6.25(7.69)</u>   |
| <u>QFED v2.4</u>  | <u>2.63(3.29)</u> | <u>3.87(3.87)</u> | <u>23.54(32.25)</u> | <u>36.81(36.58)</u> | <u>14.04(17.59)</u>   | <u>20.62(20.65)</u> |



Table S2 Regional mean total AOD, fire AOD (difference in total AOD between simulations with and without fire) and the contributions of fire AOD (fire AOD divided by total AOD in the S\_NF simulation)during April, 2009 in group A simulations.

|              | Central U.S. |              |               | Southern Mexico |              |               |
|--------------|--------------|--------------|---------------|-----------------|--------------|---------------|
|              | Total AOD    | Fire AOD     | Percentage    | Total AOD       | Fire AOD     | Percentage    |
| <u>S_NF</u>  | <u>0.066</u> |              |               | <u>0.130</u>    |              |               |
| <u>S_GF3</u> | <u>0.068</u> | <u>0.002</u> | <u>3.42%</u>  | <u>0.141</u>    | <u>0.011</u> | <u>8.10%</u>  |
| <u>S_GF4</u> | <u>0.070</u> | <u>0.004</u> | <u>5.63%</u>  | <u>0.145</u>    | <u>0.015</u> | <u>11.20%</u> |
| <u>S_QF</u>  | <u>0.099</u> | <u>0.033</u> | <u>49.33%</u> | <u>0.194</u>    | <u>0.064</u> | <u>48.84%</u> |

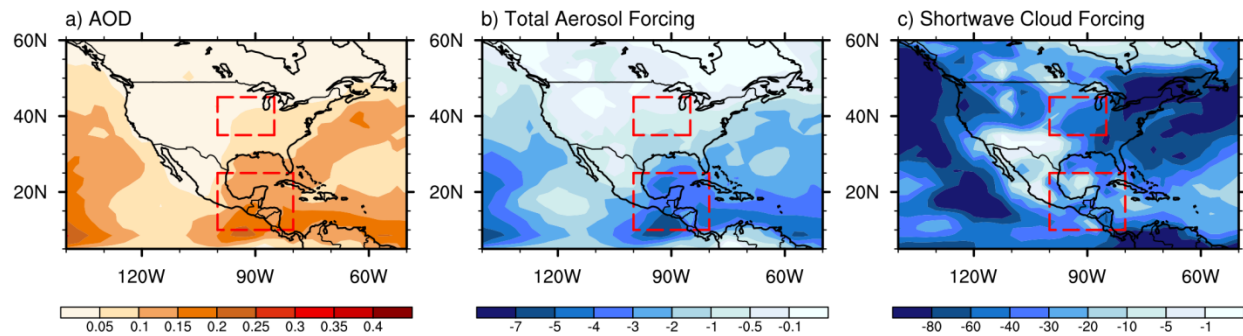

Figure S2. Spatial distributions of 10-day average (Apr. 1-10) ensemble mean a) AOD, b) total aerosol forcing and c) total shortwave cloud forcing(  $\text{W m}^{-2}$  ) in the simulation without fire emissions (E\_NF).

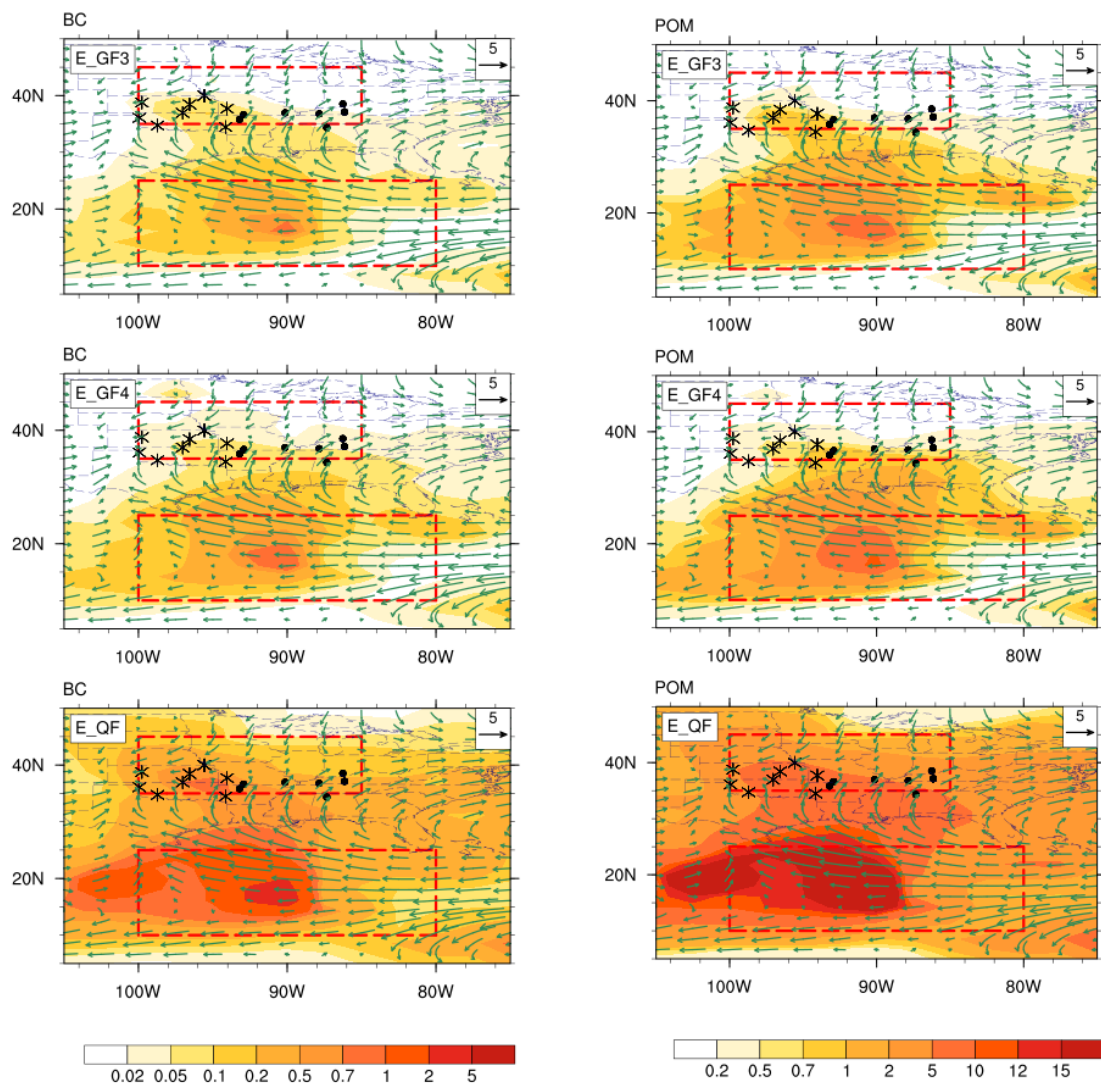

Figure S3. Spatial distributions of April mean fire BC and fire POM burden (shaded) on IMPROVE observation days in group B simulations (E\_GF3/E\_GF4/E\_QF – E\_NF). Vectors denote horizontal winds near 850hPa in group B fire simulations (E\_GF3/E\_GF4/E\_NF). IMPROVE data sites are marked with asterisks for sites near the source region and with dots for sites in the downwind region.

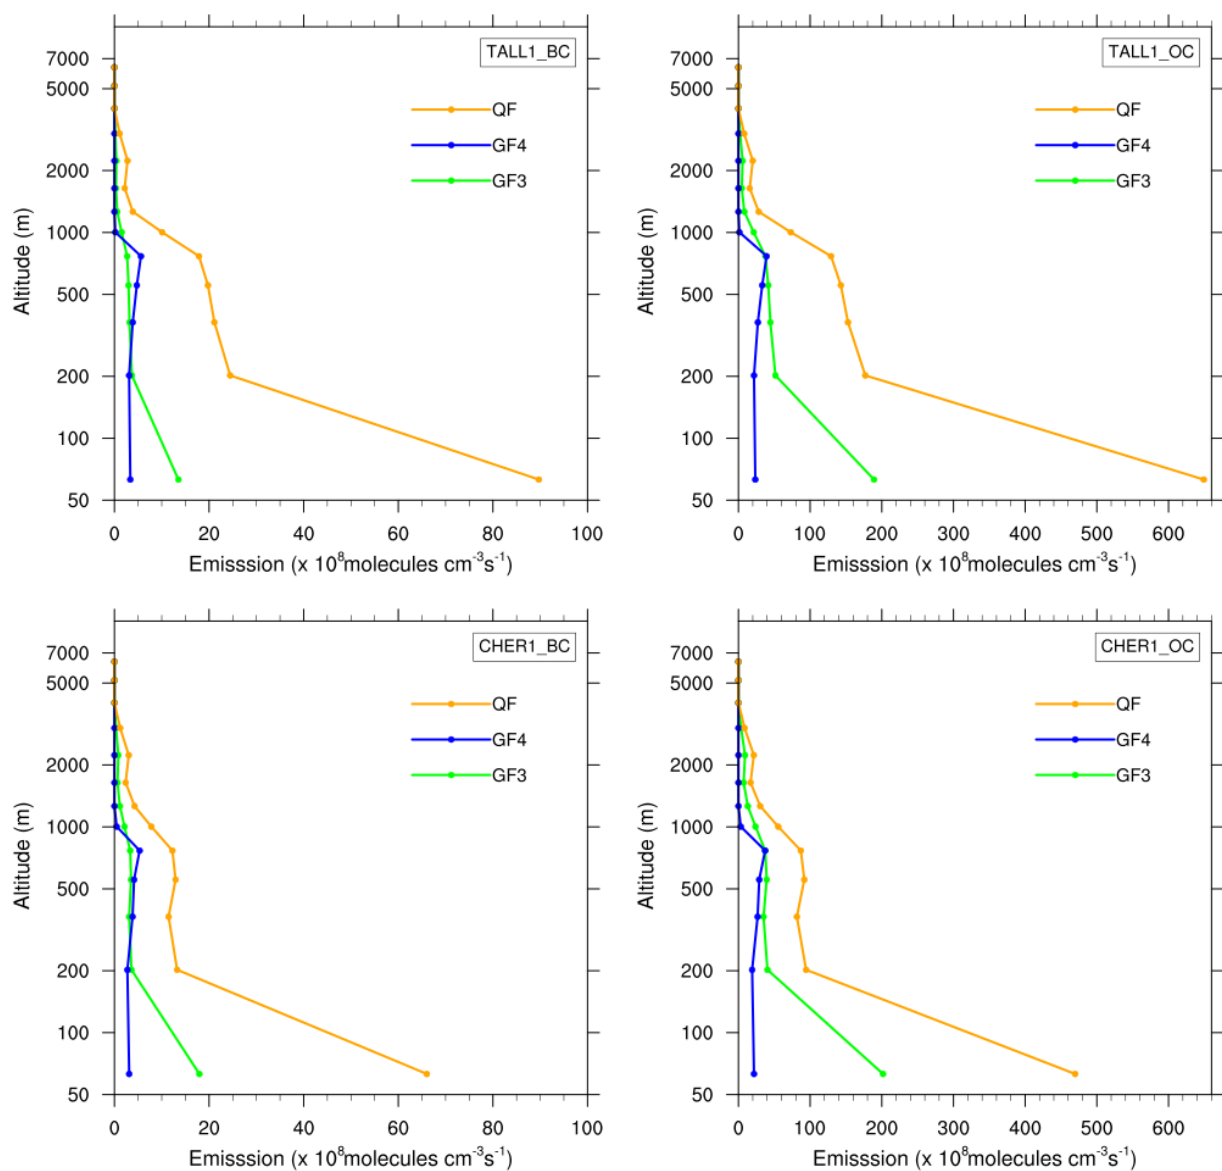

Figure S4. Vertical profiles of fire emissions of BC and OC used in simulations at sites TALL1 (38.43°N, 96.56°W) and CHER1 (38.77°N, 99.76°W).

Table S3 Regional mean total AOD, fire AOD (differences in AOD between simulations with and without fire) and radiative effects of fire aerosols during April 1-10, 2009 in group B simulations (Unit:  $W\ m^{-2}$ ). Total fire aerosol radiative effect is decomposed into shortwave direct radiative effect (SDRE), shortwave cloud radiative effect (SCRE), longwave cloud radiative effect (LCRE) and surface albedo effect (SAE).

|                        | <u>Total</u><br><u>AOD</u> | <u>Fire AOD</u> | <u>SDRE</u>  | <u>SCRE</u>  | <u>LCRE</u>  | <u>Total SAE</u> |
|------------------------|----------------------------|-----------------|--------------|--------------|--------------|------------------|
| <u>Central U.S.</u>    |                            |                 |              |              |              |                  |
| <u>E_NF</u>            | <u>0.047</u>               |                 |              |              |              |                  |
| <u>E_GF3</u>           | <u>0.050</u>               | <u>0.003</u>    | <u>0.02</u>  | <u>-0.86</u> | <u>0.04</u>  | <u>0.02</u>      |
| <u>E_GF4</u>           | <u>0.050</u>               | <u>0.003</u>    | <u>-0.01</u> | <u>-0.39</u> | <u>0.002</u> | <u>-0.003</u>    |
| <u>E_QF</u>            | <u>0.08</u>                | <u>0.033</u>    | <u>-0.10</u> | <u>-0.56</u> | <u>-0.76</u> | <u>0.12</u>      |
| <u>Southern Mexico</u> |                            |                 |              |              |              |                  |
| <u>E_NF</u>            | <u>0.135</u>               |                 |              |              |              |                  |
| <u>E_GF3</u>           | <u>0.149</u>               | <u>0.014</u>    | <u>-0.18</u> | <u>-1.91</u> | <u>-0.21</u> | <u>0.06</u>      |
| <u>E_GF4</u>           | <u>0.153</u>               | <u>0.018</u>    | <u>-0.20</u> | <u>-2.06</u> | <u>-0.23</u> | <u>0.11</u>      |
| <u>E_QF</u>            | <u>0.202</u>               | <u>0.067</u>    | <u>-0.86</u> | <u>-3.02</u> | <u>-0.47</u> | <u>0.14</u>      |

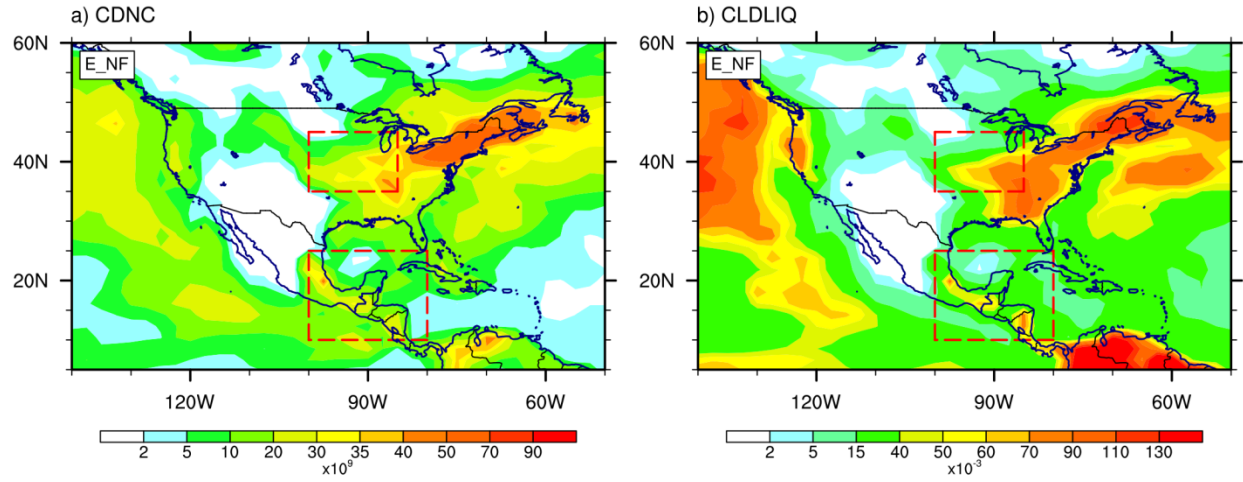

Figure S5. Spatial distributions of 10-day average (Apr. 1-10) ensemble mean a) column-integrated droplet number concentrations ( $\text{m}^{-2}$ ) and b) liquid water path ( $\text{g m}^{-2}$ ) in the E\_NF simulations.

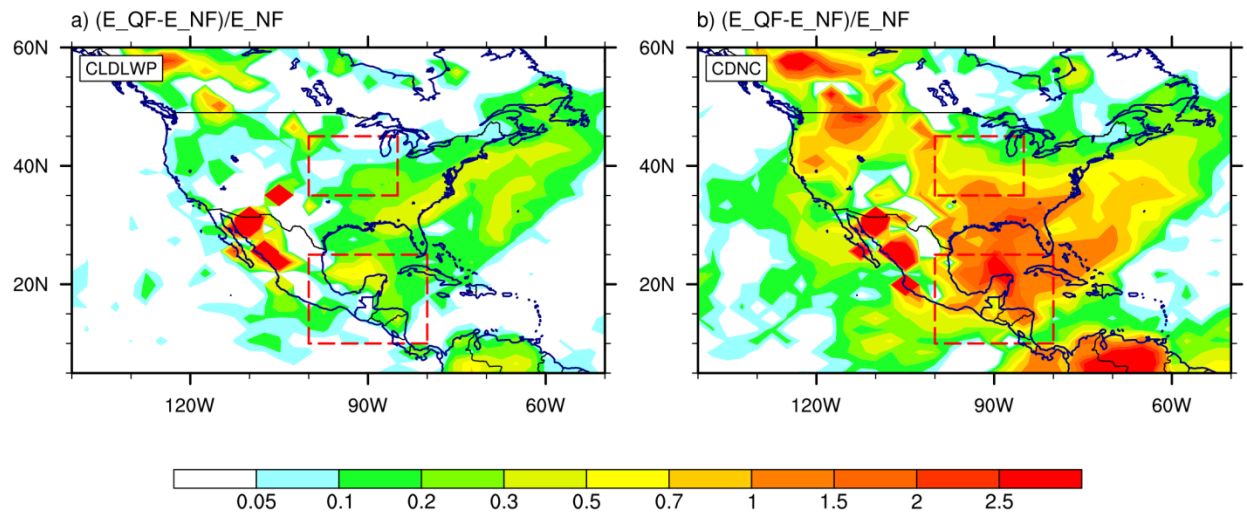

Figure S6. Relative changes of 10-day average ensemble mean cloud properties between the E\_NF and E\_QF simulations. a) cloud liquid water path, b) column-integrated droplet number concentration

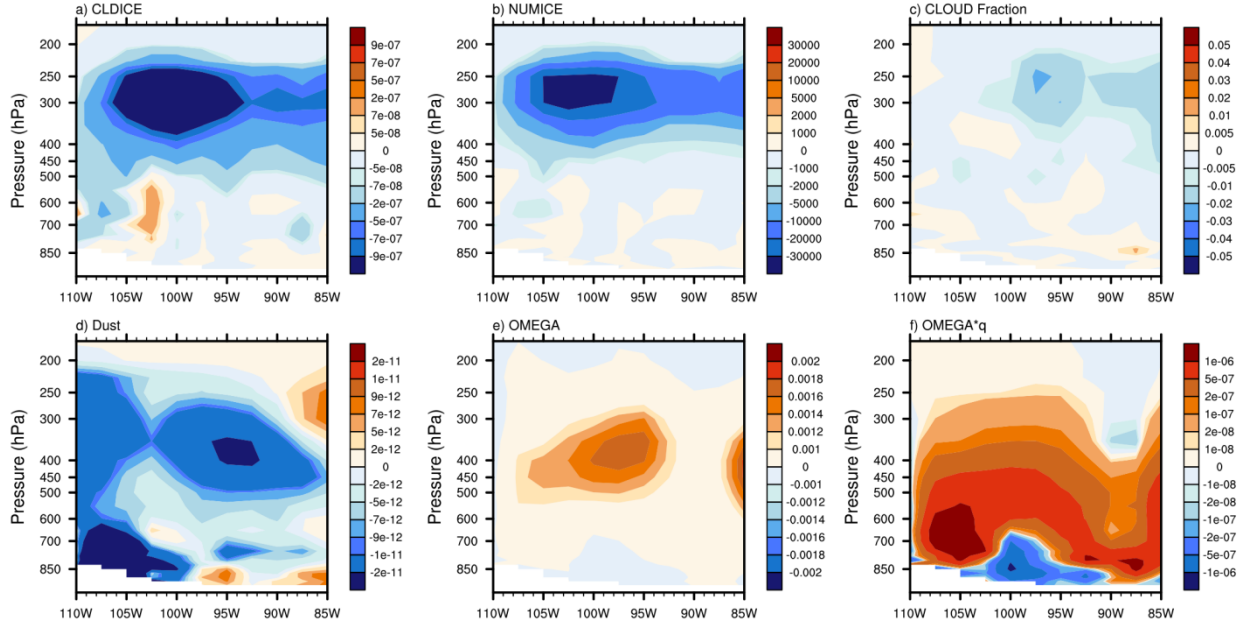

Figure S7. Pressure and longitude distribution of meridional mean ( $40-45^\circ \text{ N}$ ) difference of 10-day average (April 1 -10) ensemble mean between simulation E NF and E QF: a) cloud ice amount ( $\text{kg} \cdot \text{kg}^{-1}$ ) b) cloud ice number concentration ( $\text{kg}^{-1}$ ) c) cloud fraction (1) d) Coarse mode dust concentration ( $\text{kg} \cdot \text{kg}^{-1}$ ) e) vertical velocity ( $\text{Pa} \cdot \text{s}^{-1}$ ) f) vertical moisture transport ( $\text{kg} \cdot \text{kg}^{-1} \cdot \text{Pa} \cdot \text{s}^{-1}$ )

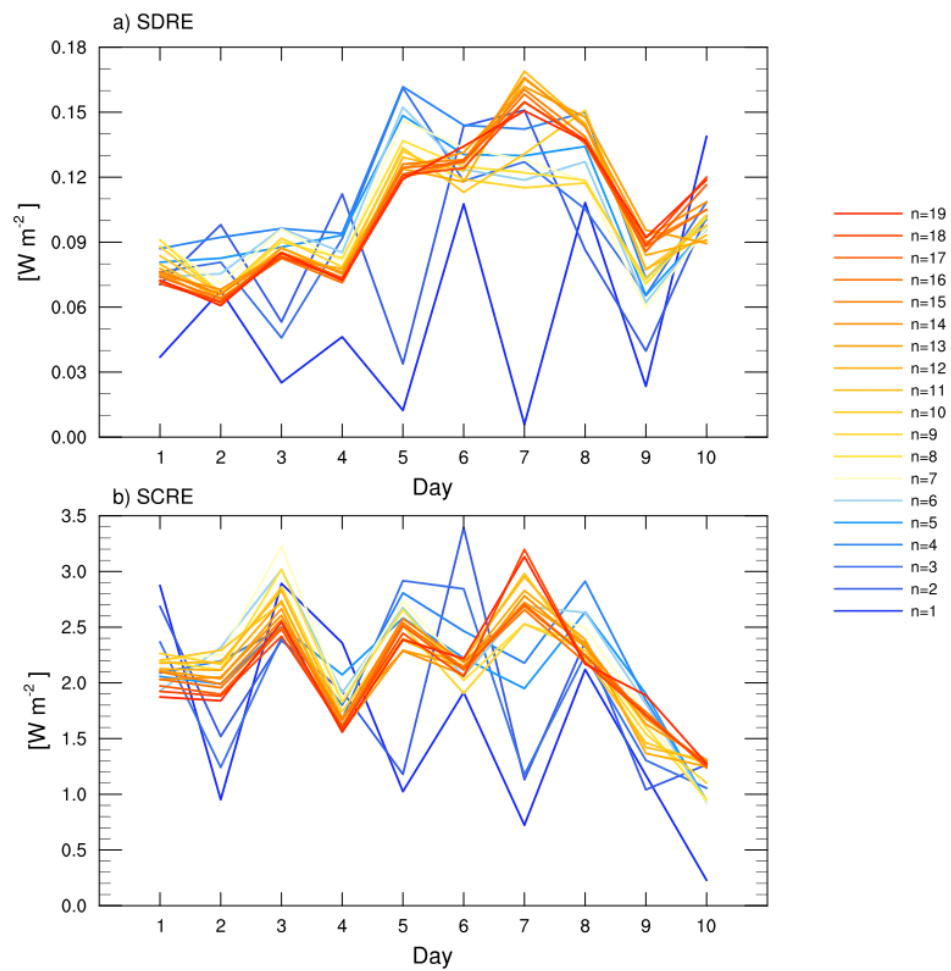

Figure S85. Time series of ensemble spread of daily regional mean fire aerosol a) SDRE and b) SCRE in Southern Mexico during Apr. 1-10, 2009 in QFED forced ensemble simulations with varying the total number of ensemble member (n=1-20).
